# Supplementary material for: BMP2 alterations in mucinous cystadenocarcinoma of the breast: insights from whole-exome sequencing
Source: PeerJ journal article supplement (doi:10.7717/peerj.19948), 2025-09-03
Supplement: minimal_dataset.zip [file minimal_dataset.zip]

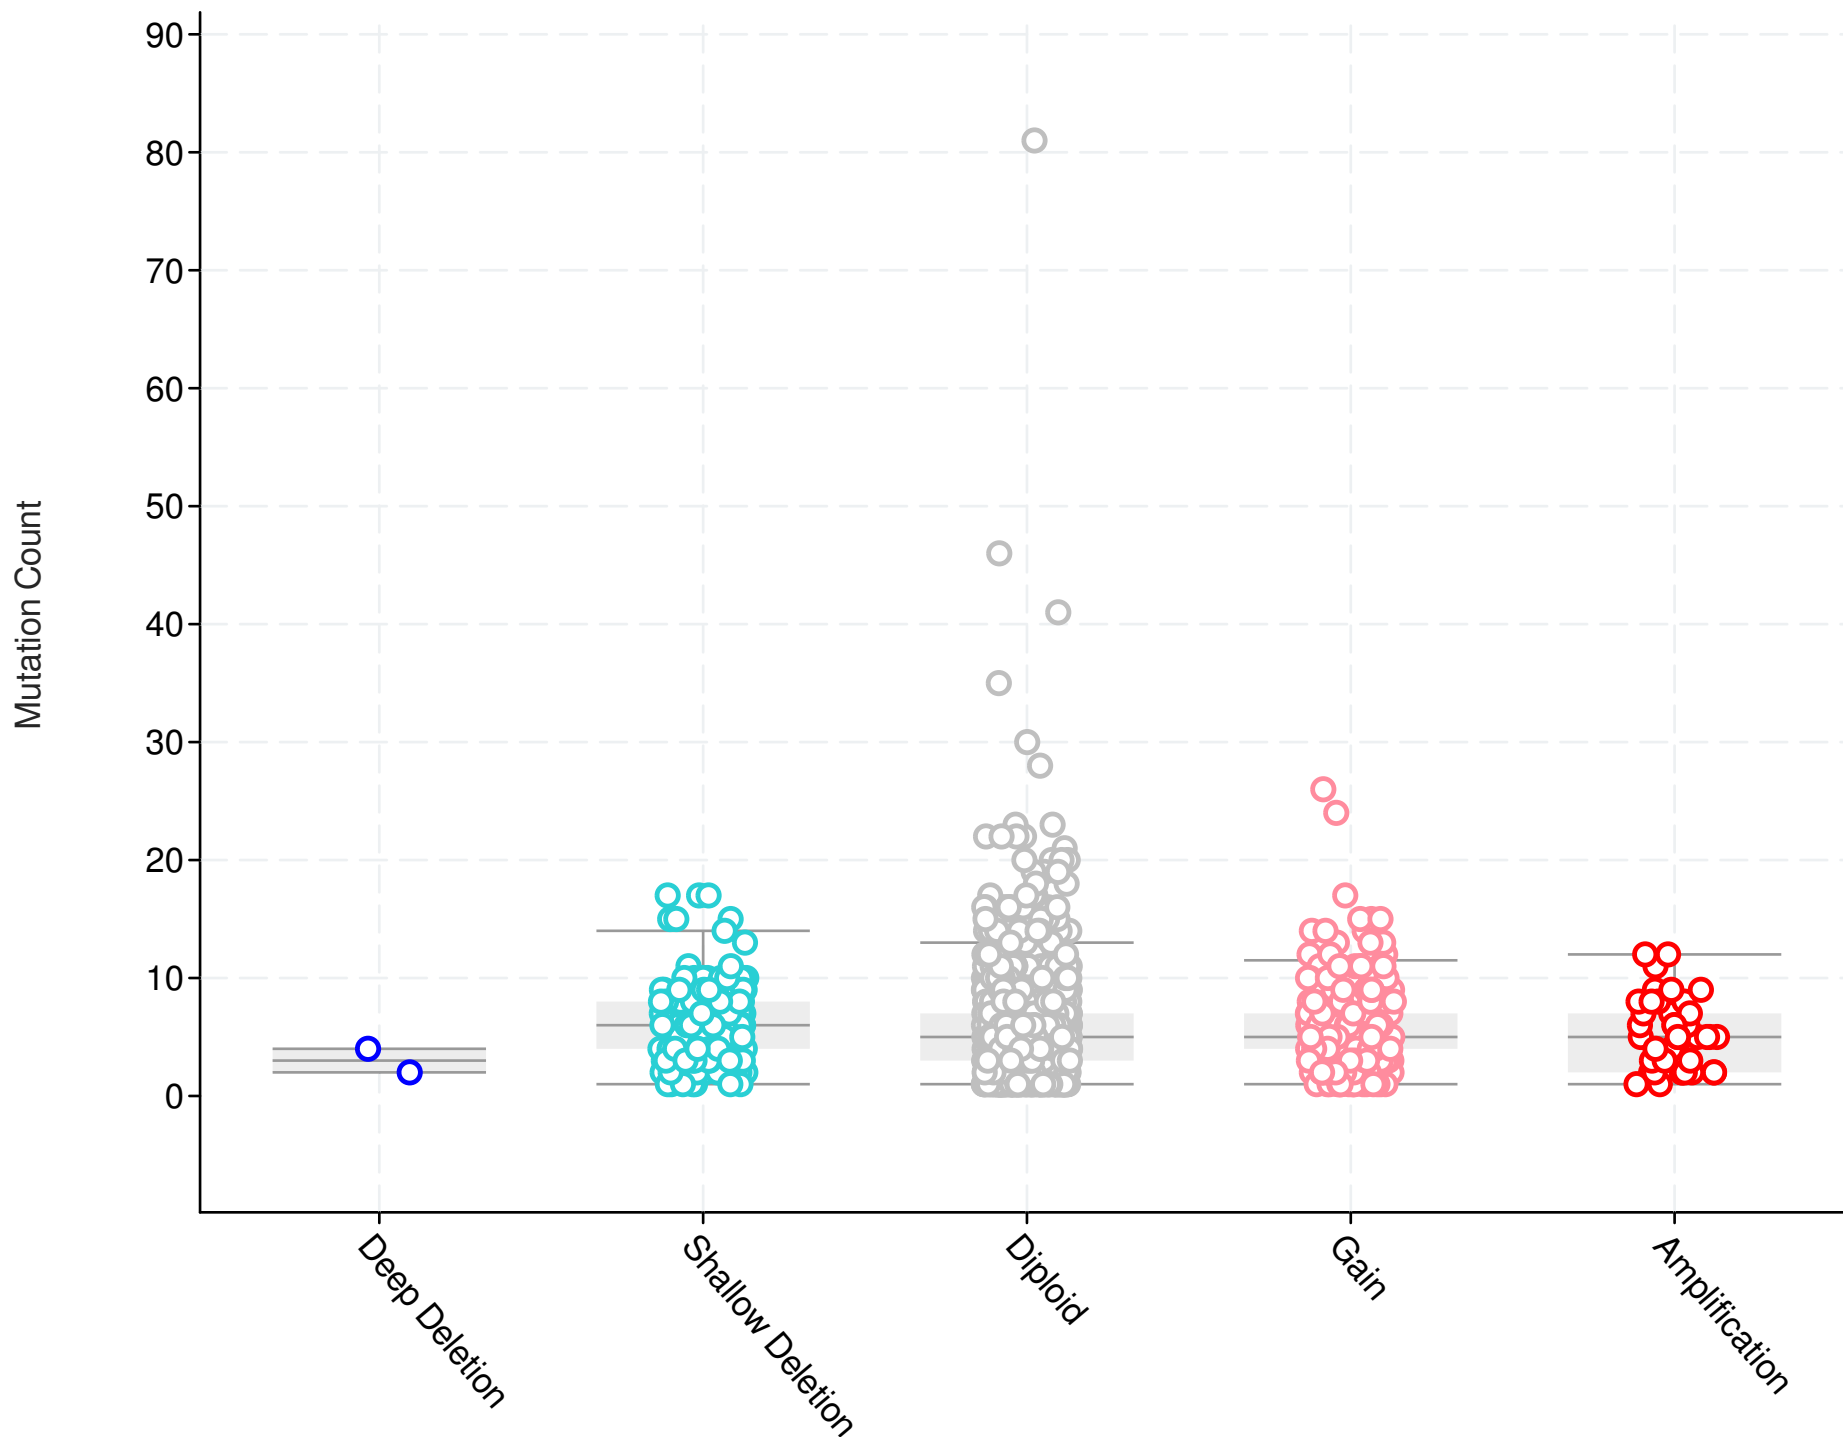

BMP2: Putative copy-number alterations from DNACopy.

- BMP2**
- Not mutated
  - Gain
  - Deep Deletion
  - Not profiled for mutations
  - Diploid
  - Amplification
  - Shallow Deletion
