# Supplementary material for: BMP2 alterations in mucinous cystadenocarcinoma of the breast: insights from whole-exome sequencing
Source: PeerJ journal article supplement (doi:10.7717/peerj.19948), 2025-09-03

Infiltration Level

BRCA

3

2

1

0

B Cell

CD8+ T Cell

CD4+ T Cell

Macrophage

Neutrophil

Dendritic Cell

Copy Number

- Deep Deletion
- Arm-level Deletion
- Diploid/Normal
- Arm-level Gain
- High Amplification

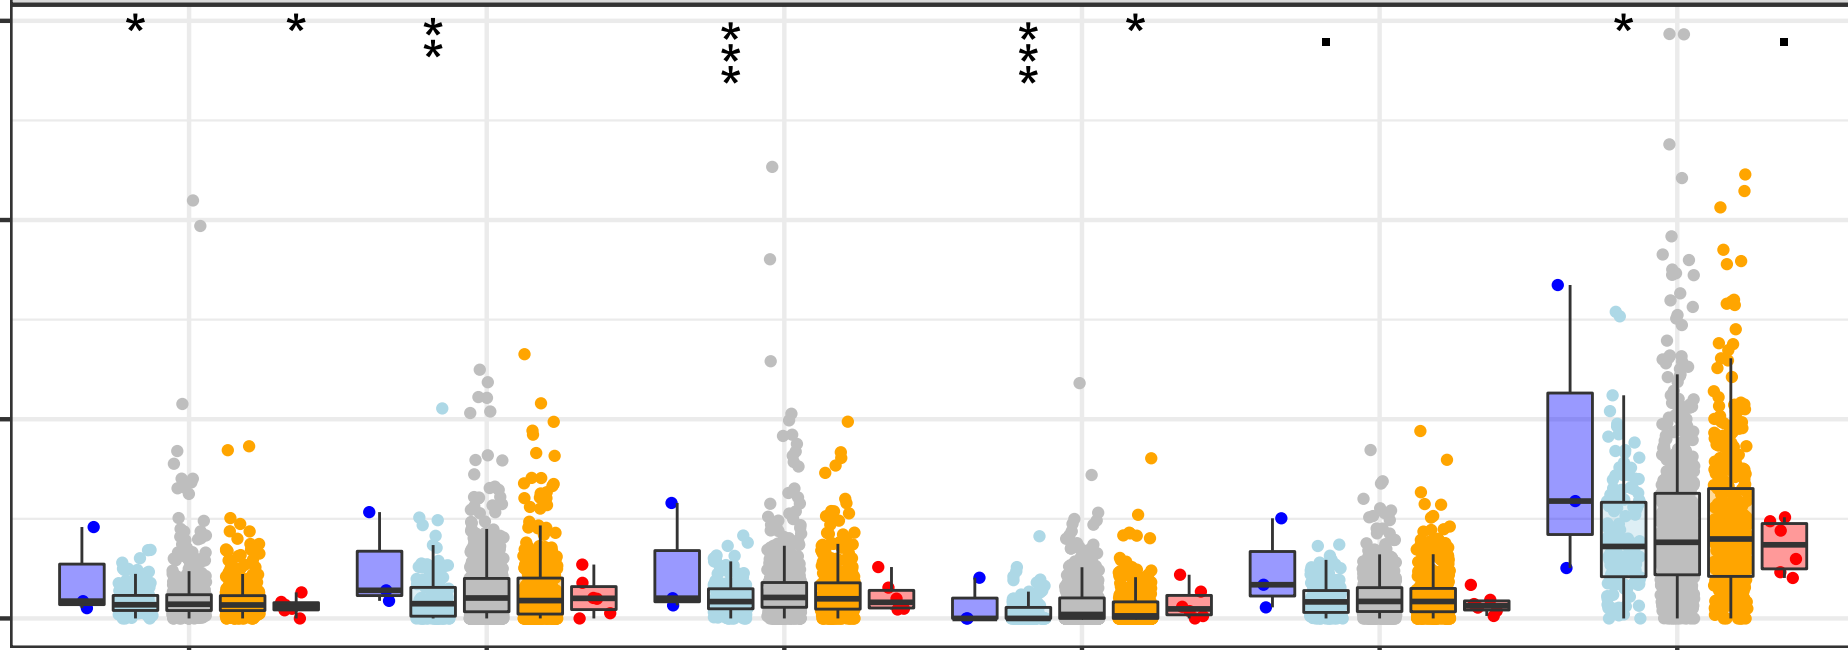

Supplement: minimal_dataset.zip [file minimal_dataset.zip]
