# Supplementary material for: BMP2 alterations in mucinous cystadenocarcinoma of the breast: insights from whole-exome sequencing
Source: PeerJ journal article supplement (doi:10.7717/peerj.19948), 2025-09-03
Supplement: minimal_dataset.zip [file minimal_dataset.zip]

Sample	Chromosome	Start	End	Num_Probes	Segment_Mean	Segment_Call
zlyy002	1	12030	29843436	3163	0.9224401026789633
zlyy002	1	31187038	104296364	3852	1.1718892389845799
zlyy002	1	104297100	146420311	1424	1.0310791326079802
zlyy002	1	146422281	148754942	233	1.0251331946493518
zlyy002	1	148754943	207897206	4658	1.0273250651587493
zlyy002	1	207925453	249231296	1999	1.1379255414332234
zlyy002	10	92952	42928943	1456	1.0668713444637472
zlyy002	10	42946903	135516082	4716	1.376244501679546
zlyy002	11	86558	61008903	3406	0.8942458852594739
zlyy002	11	61015637	89728651	2703	0.8102572614432167
zlyy002	11	89730107	134856731	2297	0.9161129829525603
zlyy002	12	67858	21628827	1608	0.8482171276474424
zlyy002	12	21629758	133811238	6661	1.012762555059004
zlyy002	13	19255077	115091852	2541	0.9773646159579357
zlyy002	14	19377488	107283198	4845	1.2150141201106672
zlyy002	15	20169954	41337438	1339	1.3593944237599025
zlyy002	15	41339503	51293477	1120	1.1468221861522907
zlyy002	15	51294589	102519139	3338	0.9503691693763888
zlyy002	16	61711	21388294	2135	1.276641463189027
zlyy002	16	21391392	46993442	1457	1.0684539872708112
zlyy002	16	46998316	90288934	2975	0.7825863869698075
zlyy002	17	11131	44377404	5136	0.8731871774761613
zlyy002	17	44382697	44772119	32	2.1535466268735117
zlyy002	17	44782034	56325108	785	0.8299518238534385
zlyy002	17	56326282	73760928	1542	0.7222219134989957
zlyy002	17	73760960	81188208	1116	0.8194327733995476
zlyy002	18	47345	34850846	1290	0.8101037607144007
zlyy002	18	34854045	77936084	1033	1.150385343235833
zlyy002	19	60521	24310860	3836	0.8786833122615098
zlyy002	19	29567012	33706958	173	1.6298519600757682
zlyy002	19	33792003	43699452	1582	0.8561828721673654
zlyy002	19	43702092	43708487	3	0.07035263014042174
zlyy002	19	43765975	55903187	2355	0.8534312005298533
zlyy002	19	55912776	56704494	141	1.9727040150315973
zlyy002	19	56717227	59110849	353	0.8664485443934815
zlyy002	2	41399	95537571	3996	1.1732745596541367
zlyy002	2	95537572	170667930	3310	0.8849759166704847
zlyy002	2	170668835	243169026	3973	0.9669526833365587
zlyy002	20	68209	48127851	2829	0.969792196400424
zlyy002	20	48129494	62959393	895	1.2342857482240774
zlyy002	21	9755701	48111099	1632	1.359705659729806
zlyy002	22	16255715	24325905	878	0.9357996018534301
zlyy002	22	24340623	39358719	1381	1.1619837635159203
zlyy002	22	39380110	39387700	3	0.05599143750460086
zlyy002	22	39388024	51237598	1133	1.174029703688574
zlyy002	3	367597	44948589	1991	1.1435212773213084
zlyy002	3	44948590	97806175	2268	0.9354899177465948
zlyy002	3	97806176	110611538	398	1.2343544758011205
zlyy002	3	110611795	122964979	653	0.9745776346784387
zlyy002	3	122978273	124412770	118	0.48523525867325984
zlyy002	3	124413035	126679284	207	0.8809207919060783
zlyy002	3	126707454	126916321	24	0.3497614858312438
zlyy002	3	127105877	146167088	1035	0.9001799895717569
zlyy002	3	146167089	197955262	1955	1.1357276855365752
zlyy002	4	53188	191003119	5572	1.0129822326497715
zlyy002	5	140334	41055887	1294	1.1450867985705007
zlyy002	5	41055888	150504062	3859	0.9725129255353637
zlyy002	5	150507662	180899478	1459	0.7451524549424207
zlyy002	6	105879	32487164	1809	1.1248628264803957
zlyy002	6	32487165	35806667	455	1.091789872693485
zlyy002	6	35810169	171055117	5005	1.1454648829918619
zlyy002	7	13694	158937489	7442	1.4330002487172528
zlyy002	8	14034	12423598	436	1.3056564512416702
zlyy002	8	12459225	142437196	4070	1.034148473950687
zlyy002	8	142437761	146279593	463	0.8113278967019139
zlyy002	9	12143	77415283	1668	1.0101643197408978
zlyy002	9	77415284	141130547	4372	0.7852361843169248
