# Supplementary figures and images for: BMP2 alterations in mucinous cystadenocarcinoma of the breast: insights from whole-exome sequencing
Source: PeerJ journal article supplement (doi:10.7717/peerj.19948), 2025-09-03

Logrank Test P-Value: 3.218e-3

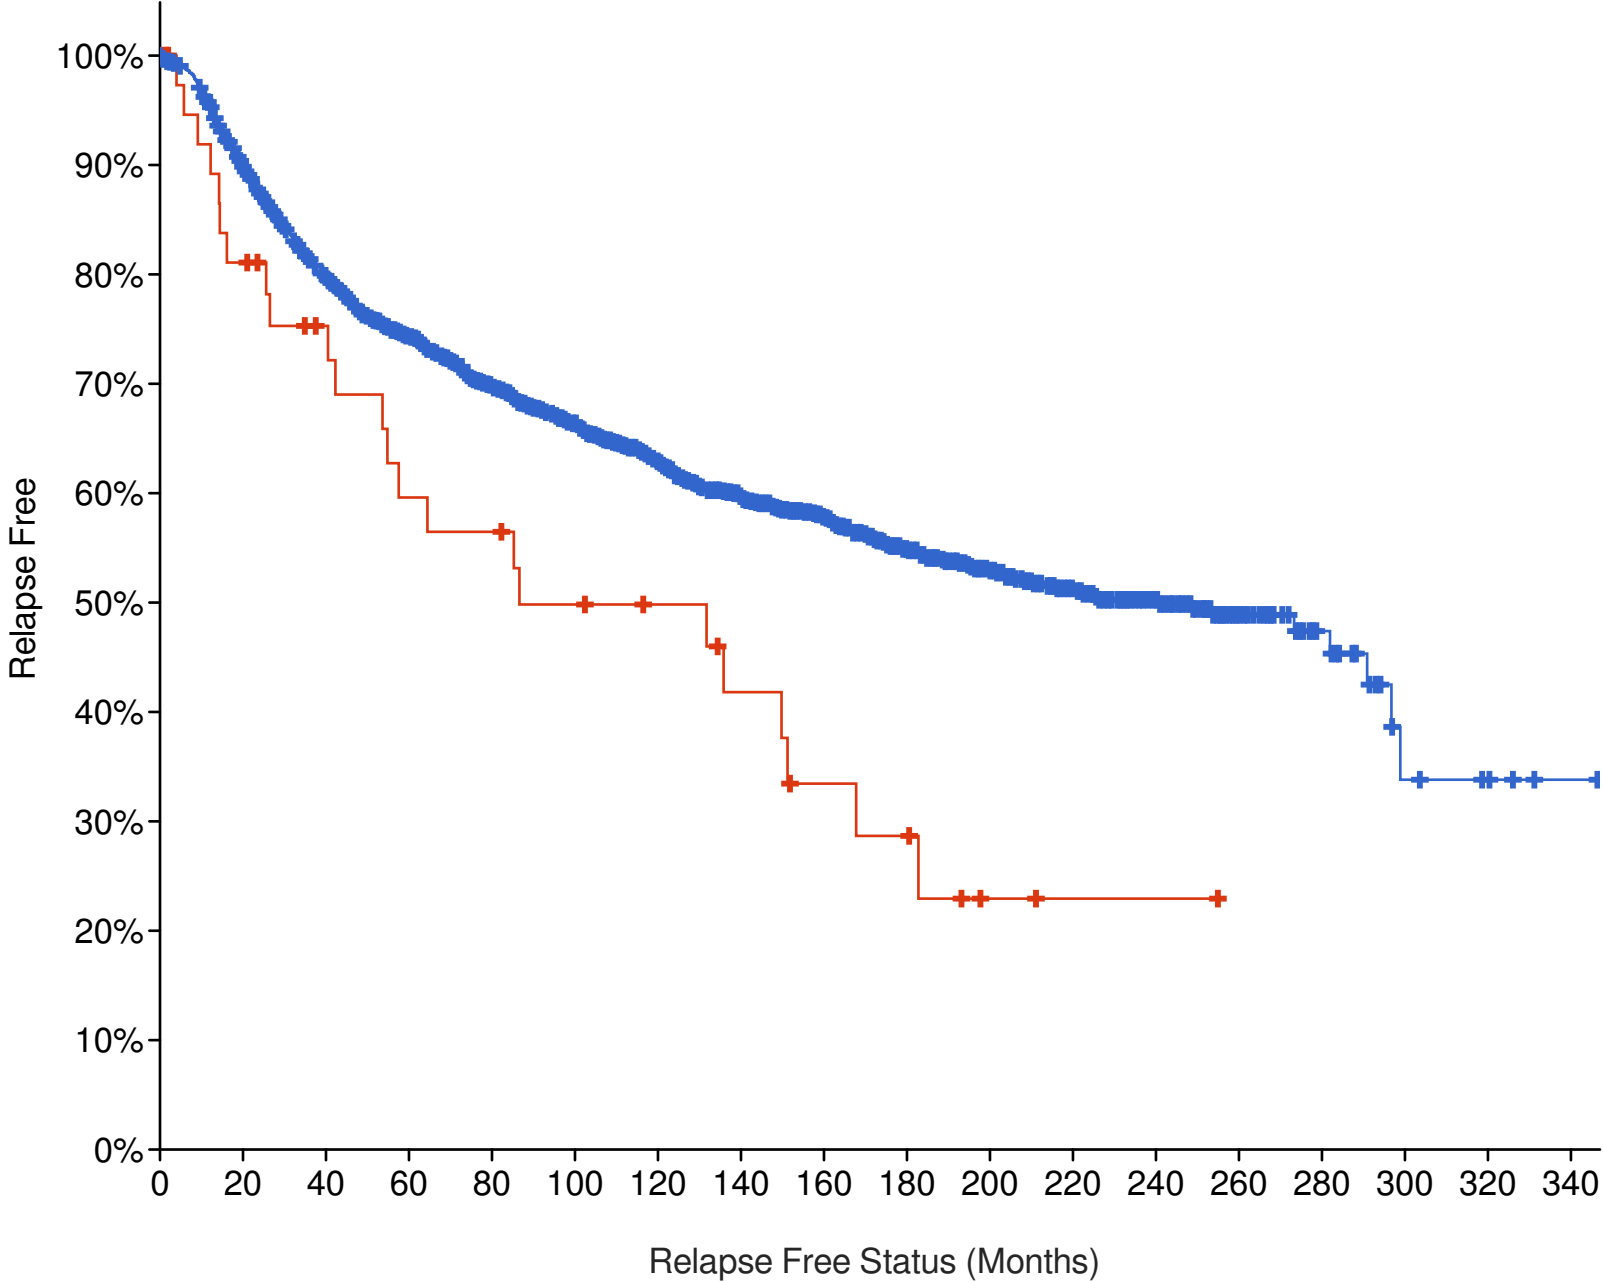

**Relapse Free**

■ Altered group

■ Unaltered group

Supplement: minimal_dataset.zip [file minimal_dataset.zip]

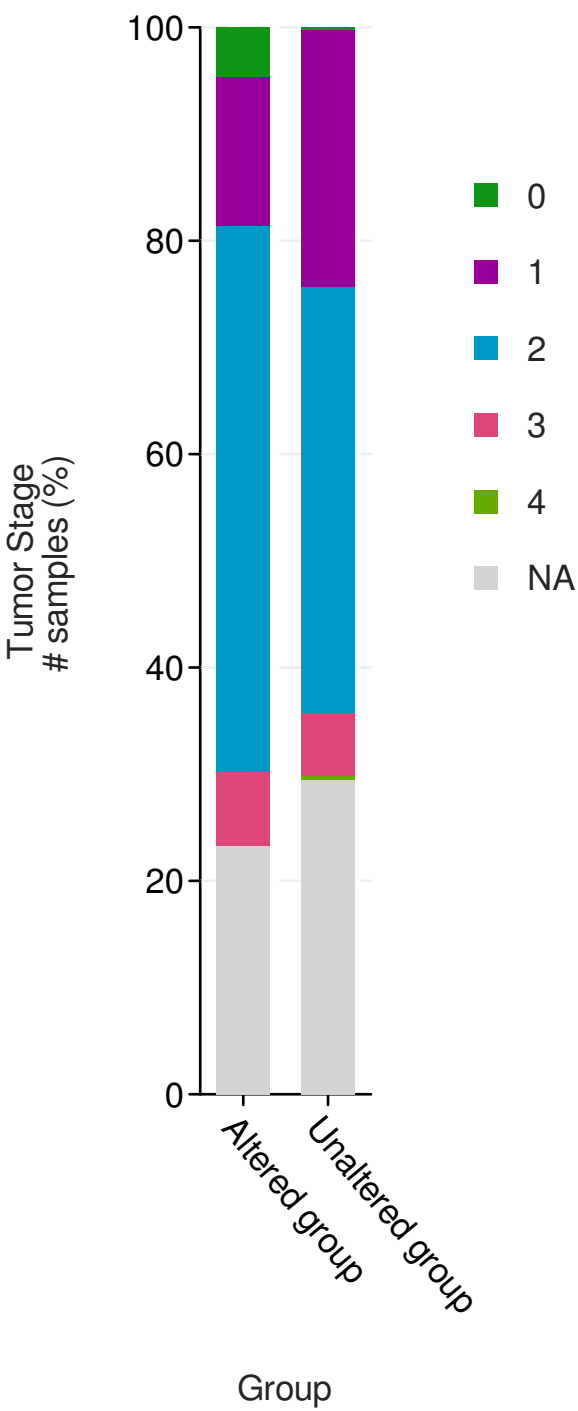

Supplement: minimal_dataset.zip [file minimal_dataset.zip]

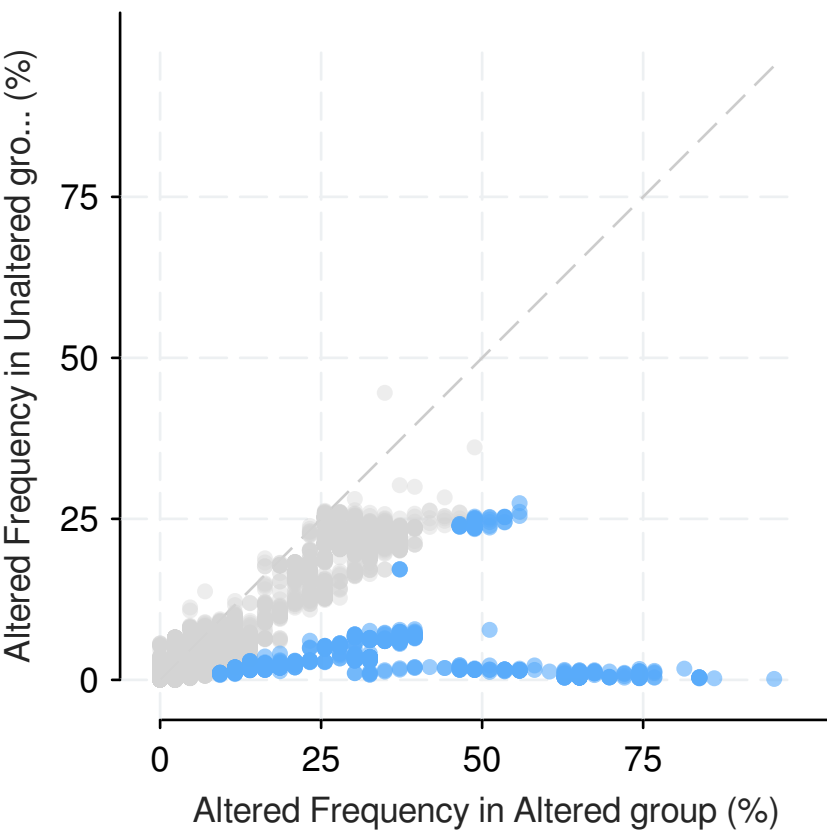

Supplement: minimal_dataset.zip [file minimal_dataset.zip]

Logrank Test P-Value: 0.0654

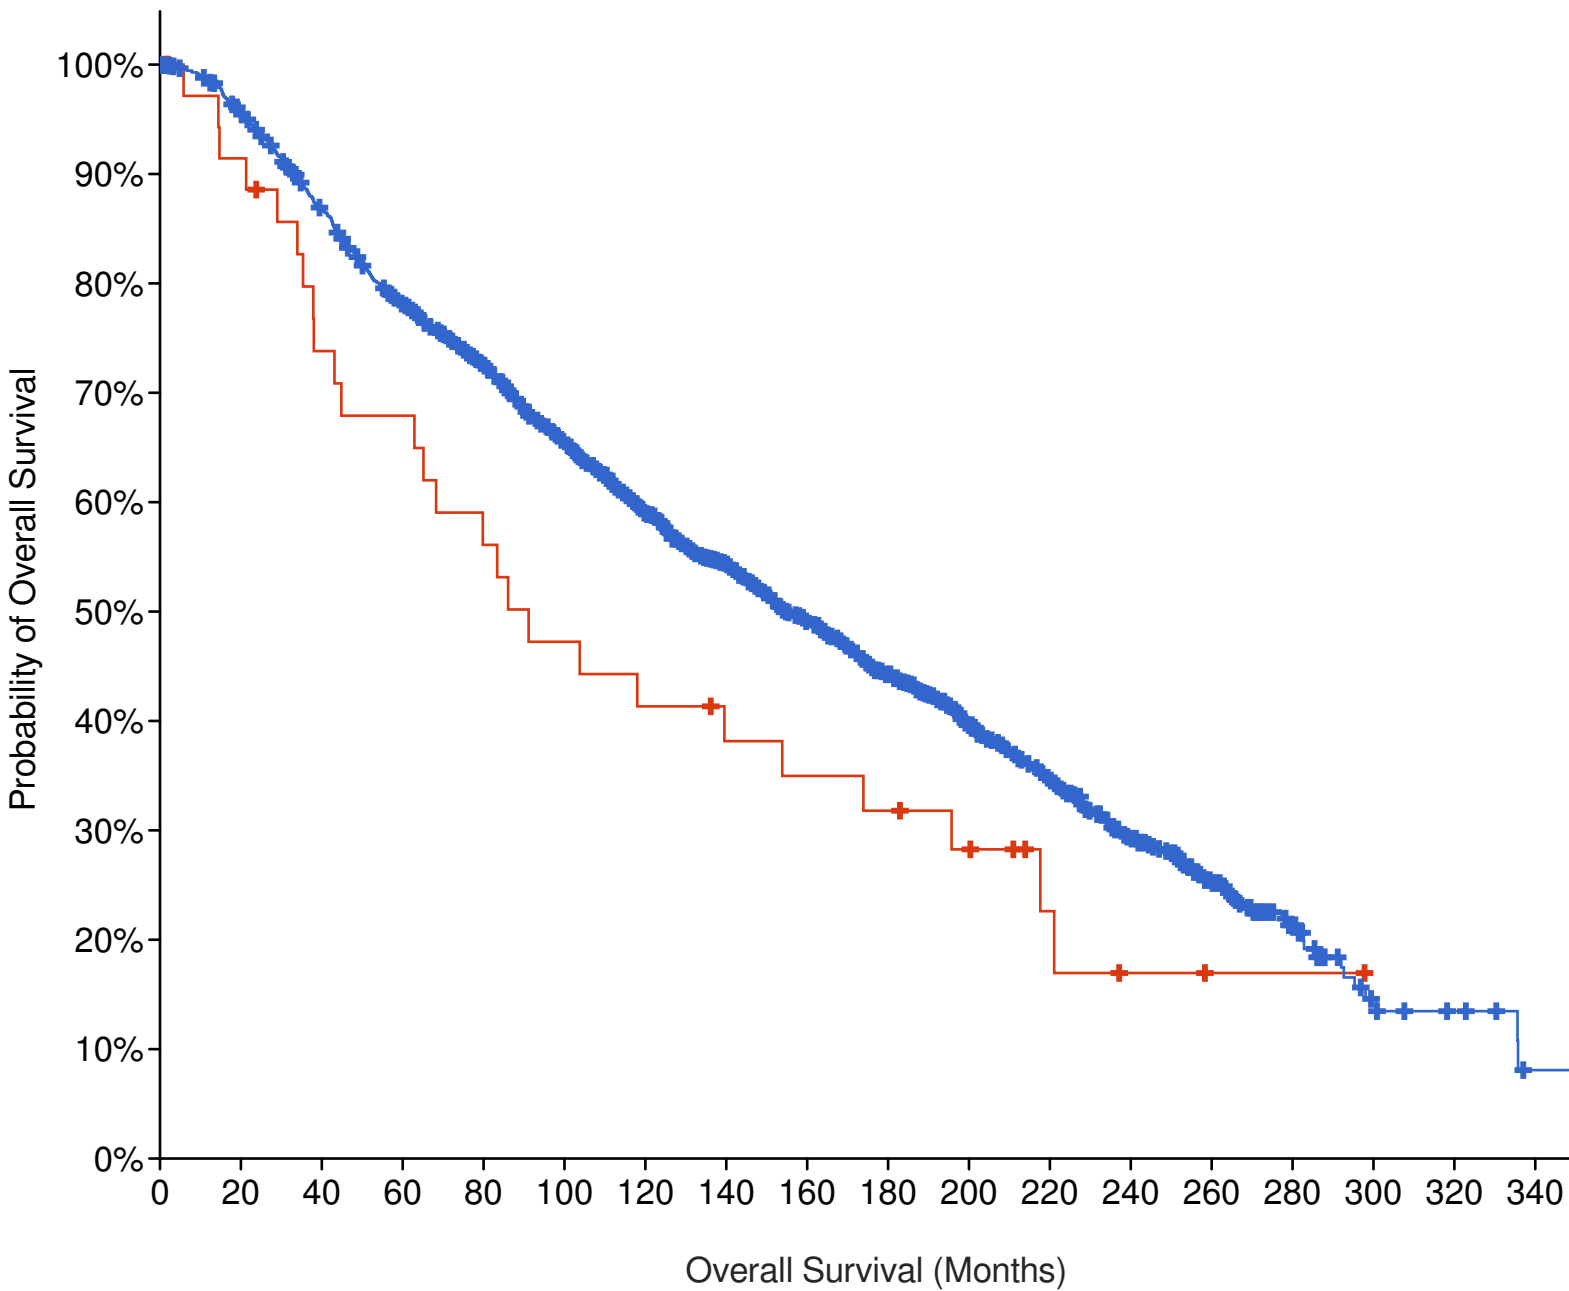

Overall

- Altered group
- Unaltered group

Supplement: minimal_dataset.zip [file minimal_dataset.zip]

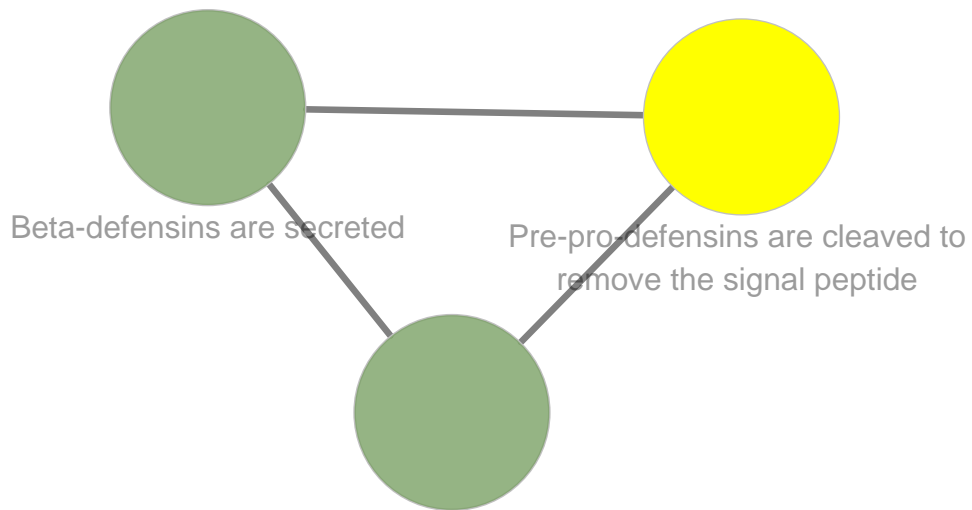

**Beta-defensins bind  
microbial  
membranes causing  
disruption**

Supplement: minimal_dataset.zip [file minimal_dataset.zip]

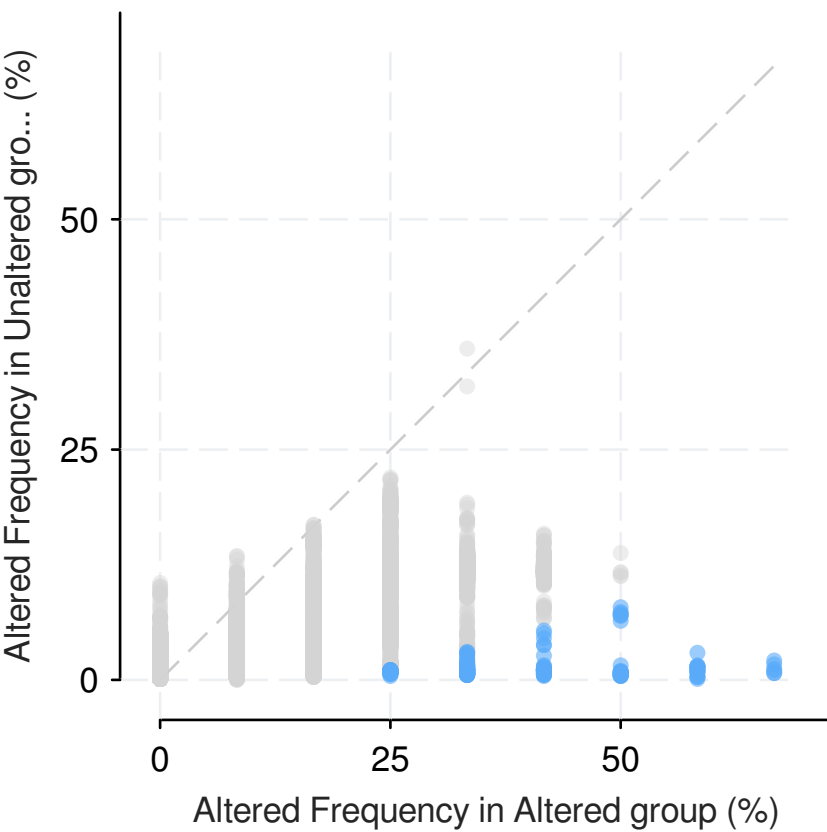

Supplement: minimal_dataset.zip [file minimal_dataset.zip]

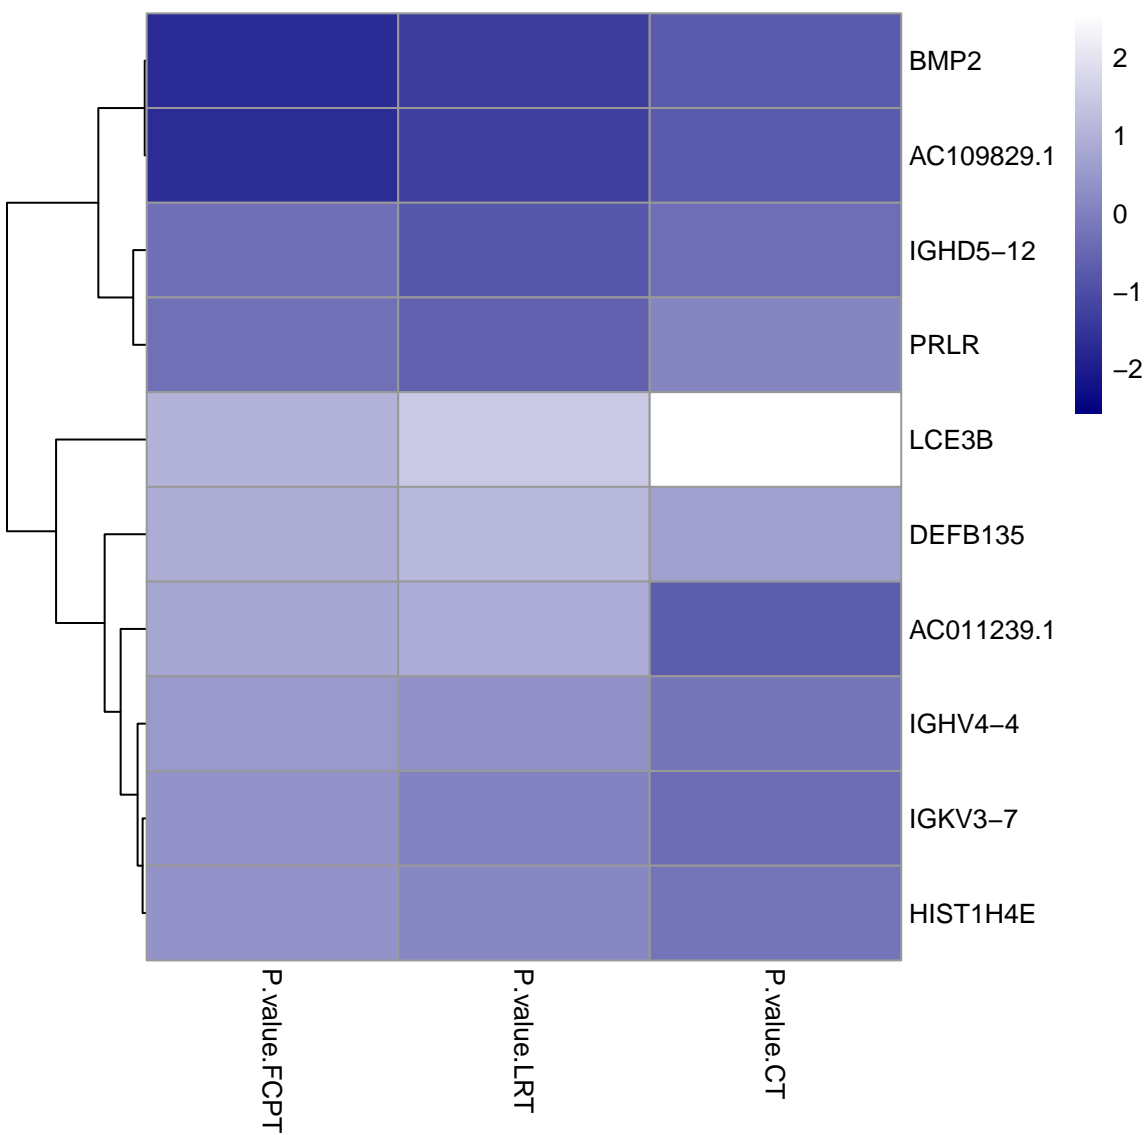

Supplement: minimal_dataset.zip [file minimal_dataset.zip]

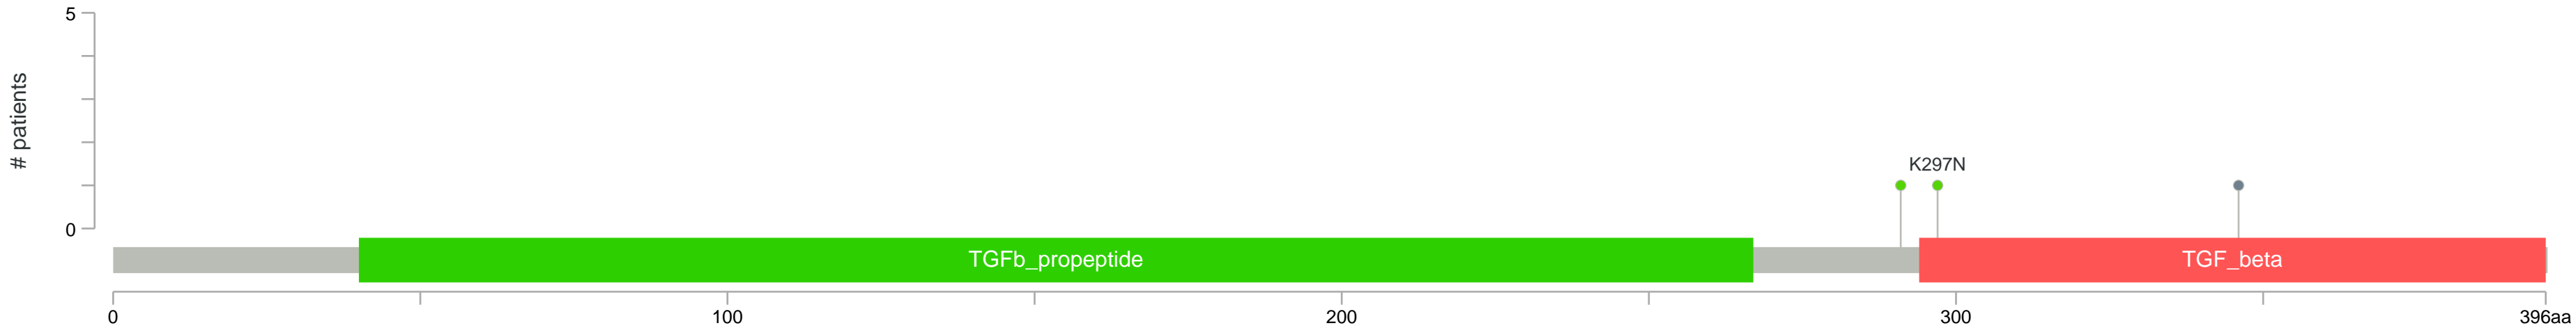

Supplement: minimal_dataset.zip [file minimal_dataset.zip]

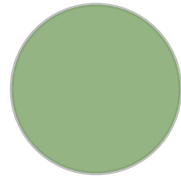

**positive regulation  
of protein tyrosine  
kinase activity**

Supplement: minimal_dataset.zip [file minimal_dataset.zip]

Metastatic tumor indicator  
# samples (%)

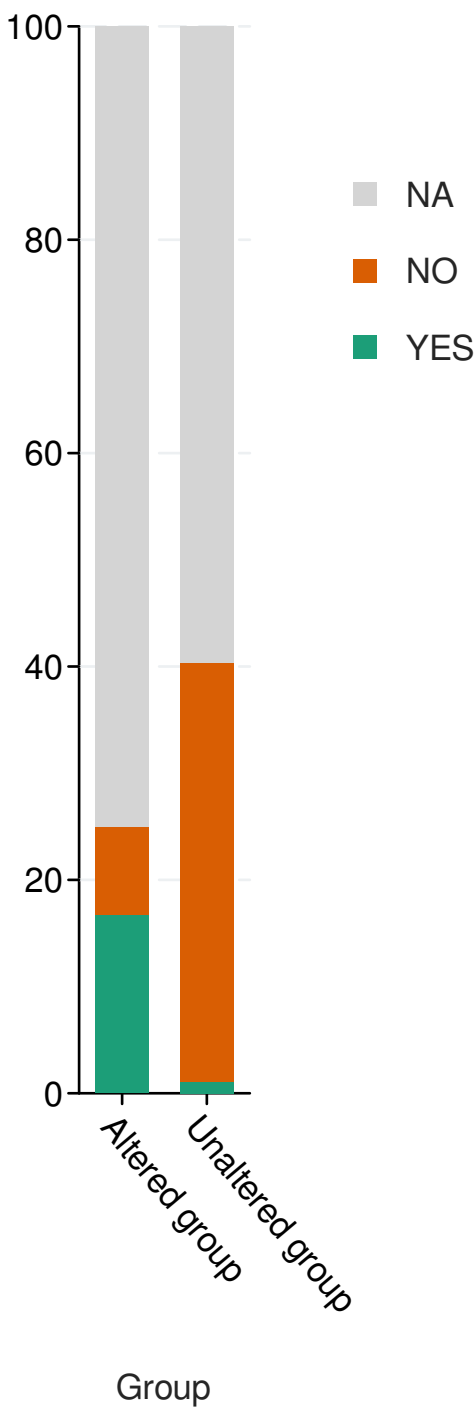

Supplement: minimal_dataset.zip [file minimal_dataset.zip]



**U2-type catalytic  
step 2 spliceosome**



**intrinsic component  
of external side of  
plasma membrane**

Supplement: minimal_dataset.zip [file minimal_dataset.zip]

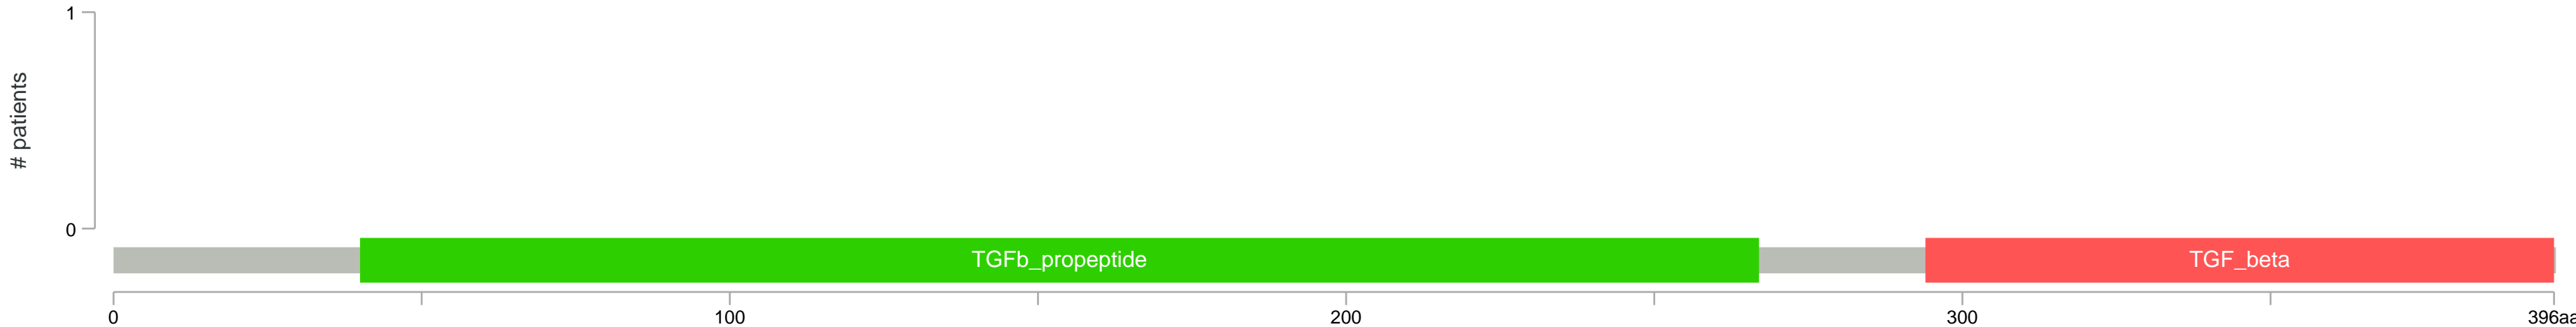

Supplement: minimal_dataset.zip [file minimal_dataset.zip]

*zlyy001*

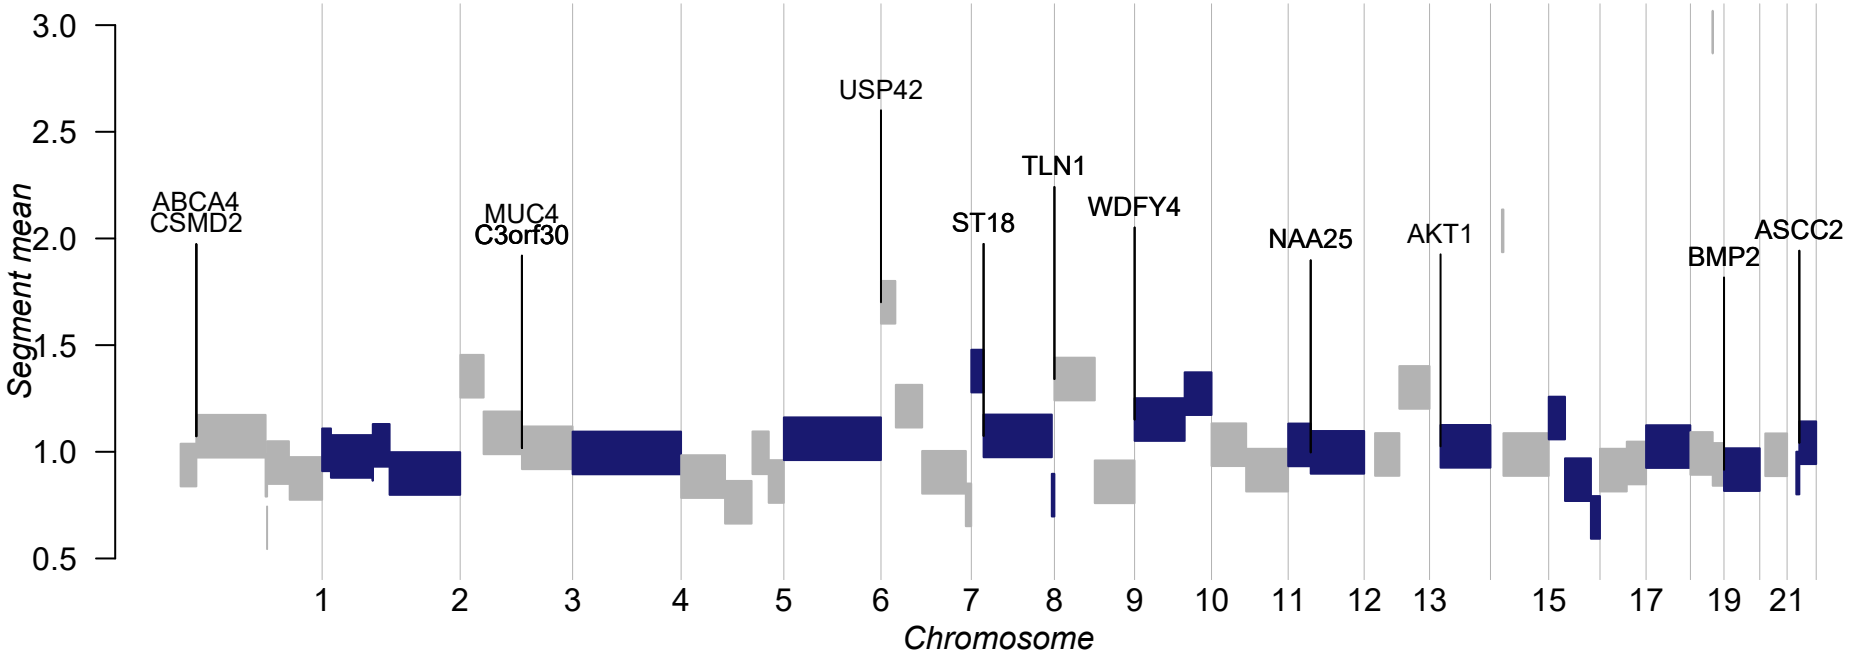

Supplement: minimal_dataset.zip [file minimal_dataset.zip]

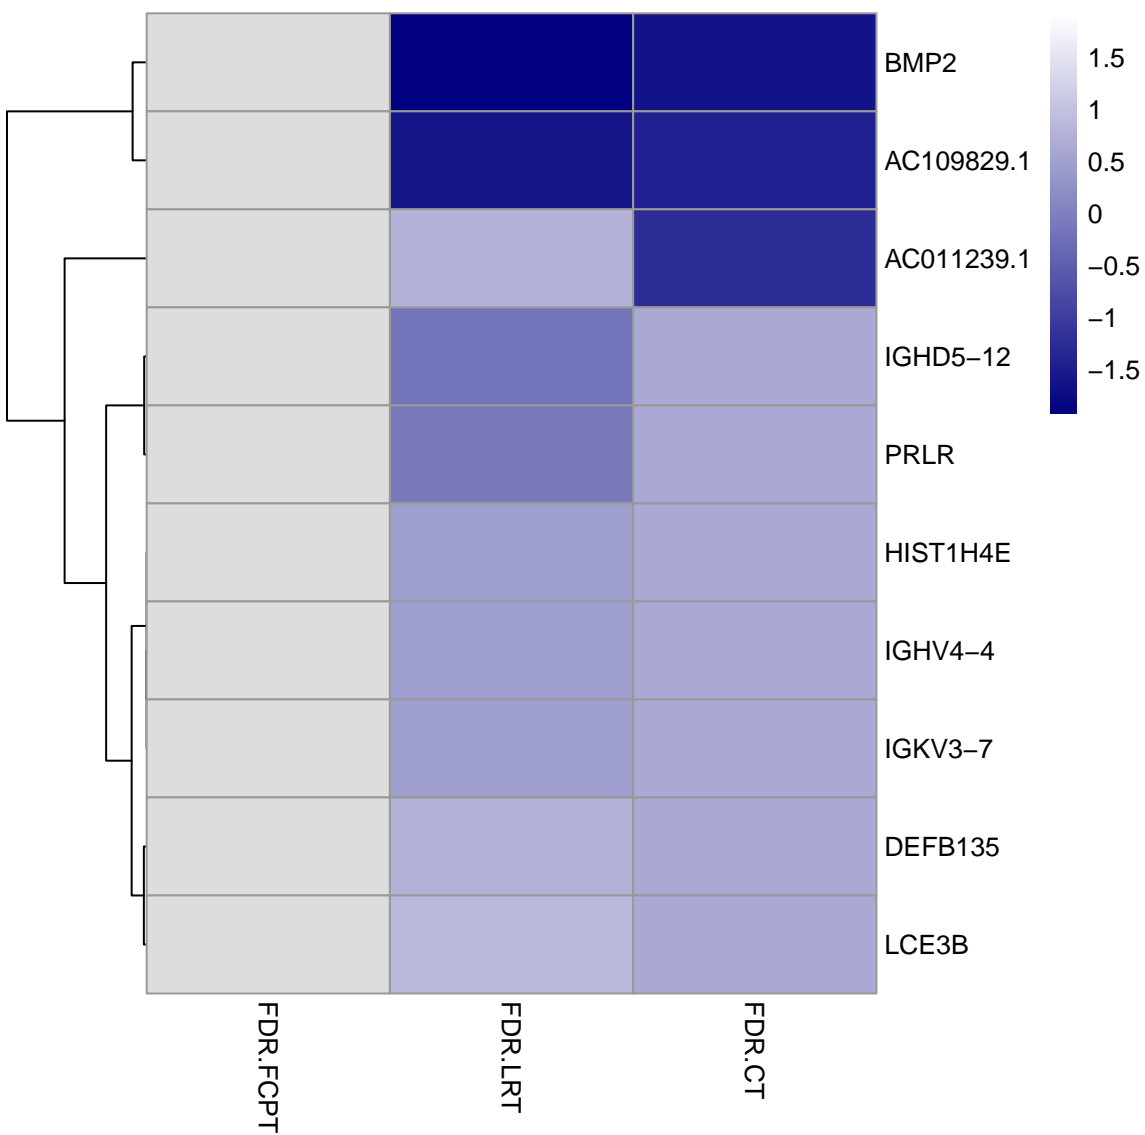

Supplement: minimal_dataset.zip [file minimal_dataset.zip]

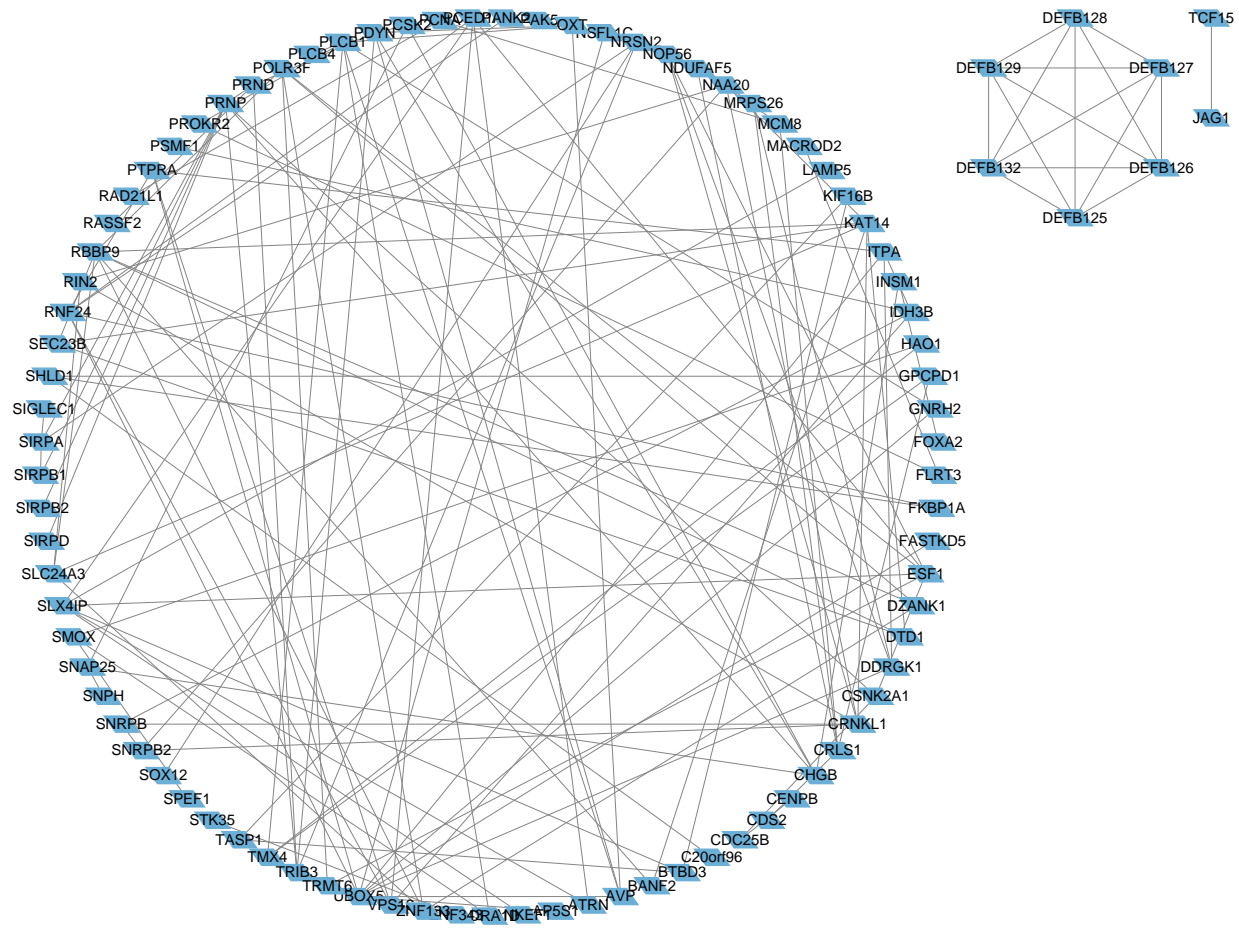

Supplement: minimal_dataset.zip [file minimal_dataset.zip]

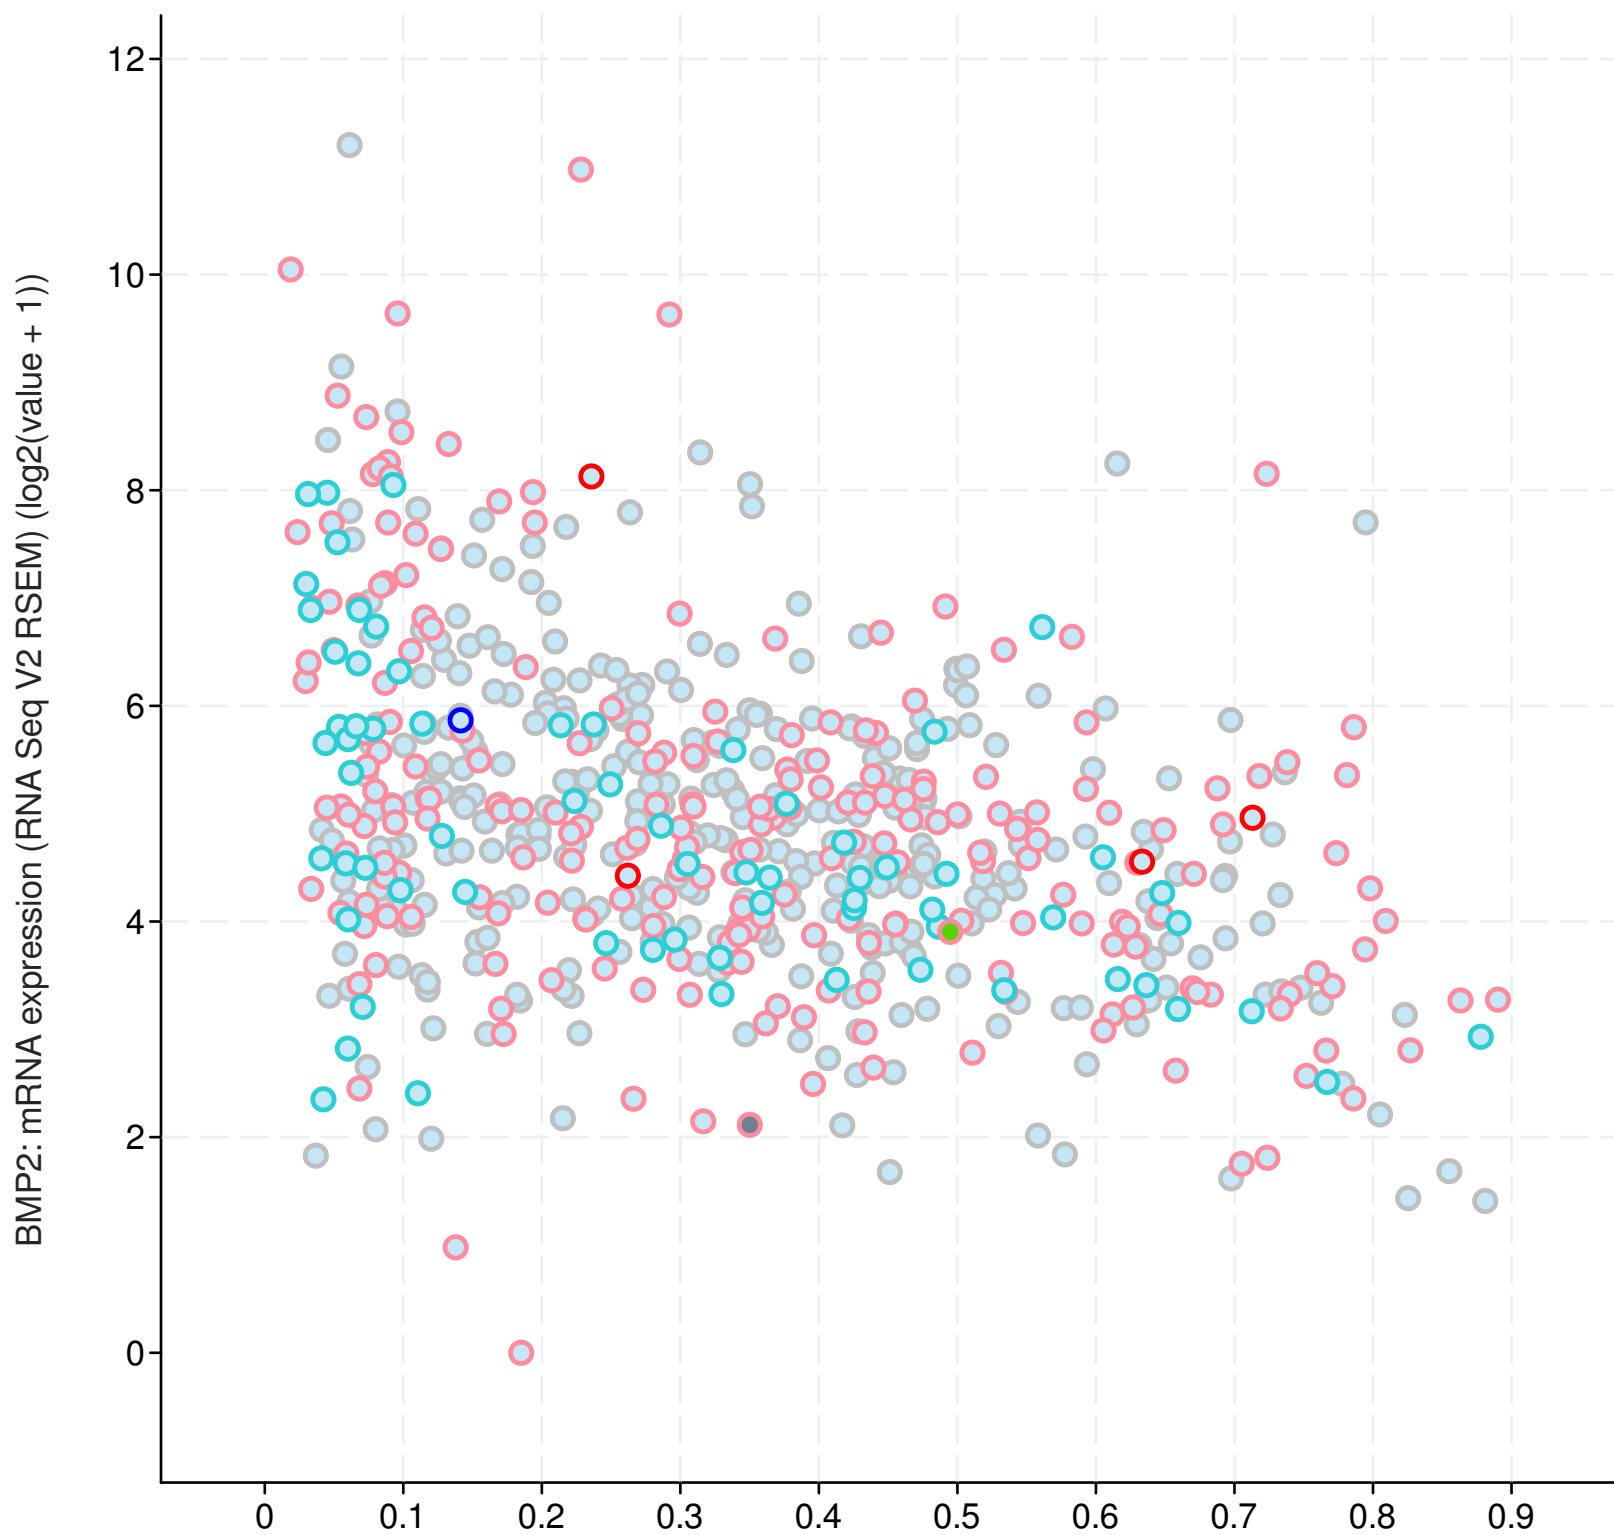

Spearman: -0.35  
( $p = 1.77\text{e-}20$ )

Pearson: -0.37  
( $p = 6.73\text{e-}23$ )

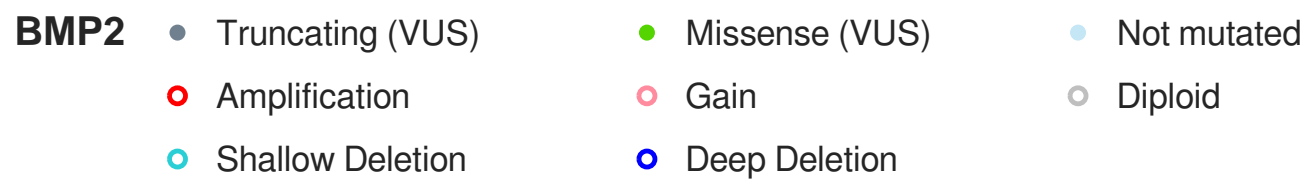

Supplement: minimal_dataset.zip [file minimal_dataset.zip]

Logrank Test P-Value: 6.259e-3

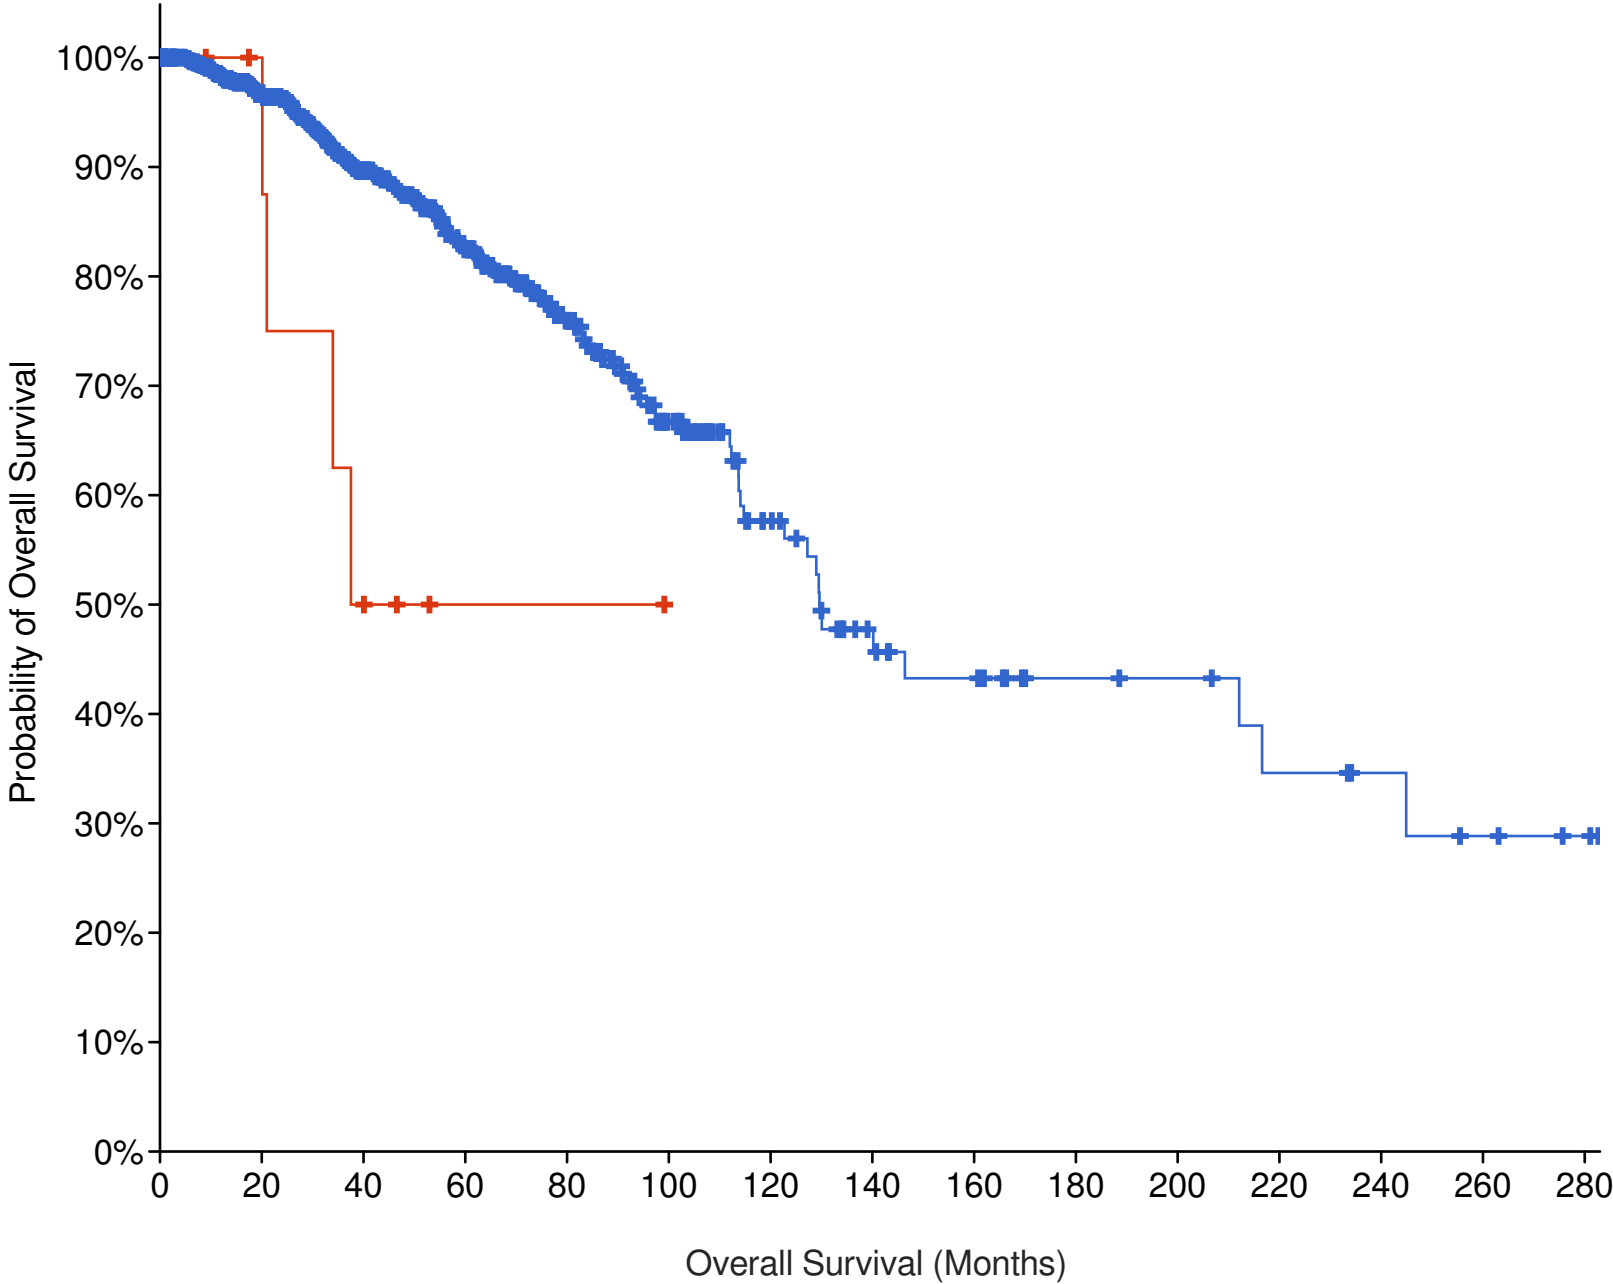

Overall

- Altered group
- Unaltered group

Supplement: minimal_dataset.zip [file minimal_dataset.zip]

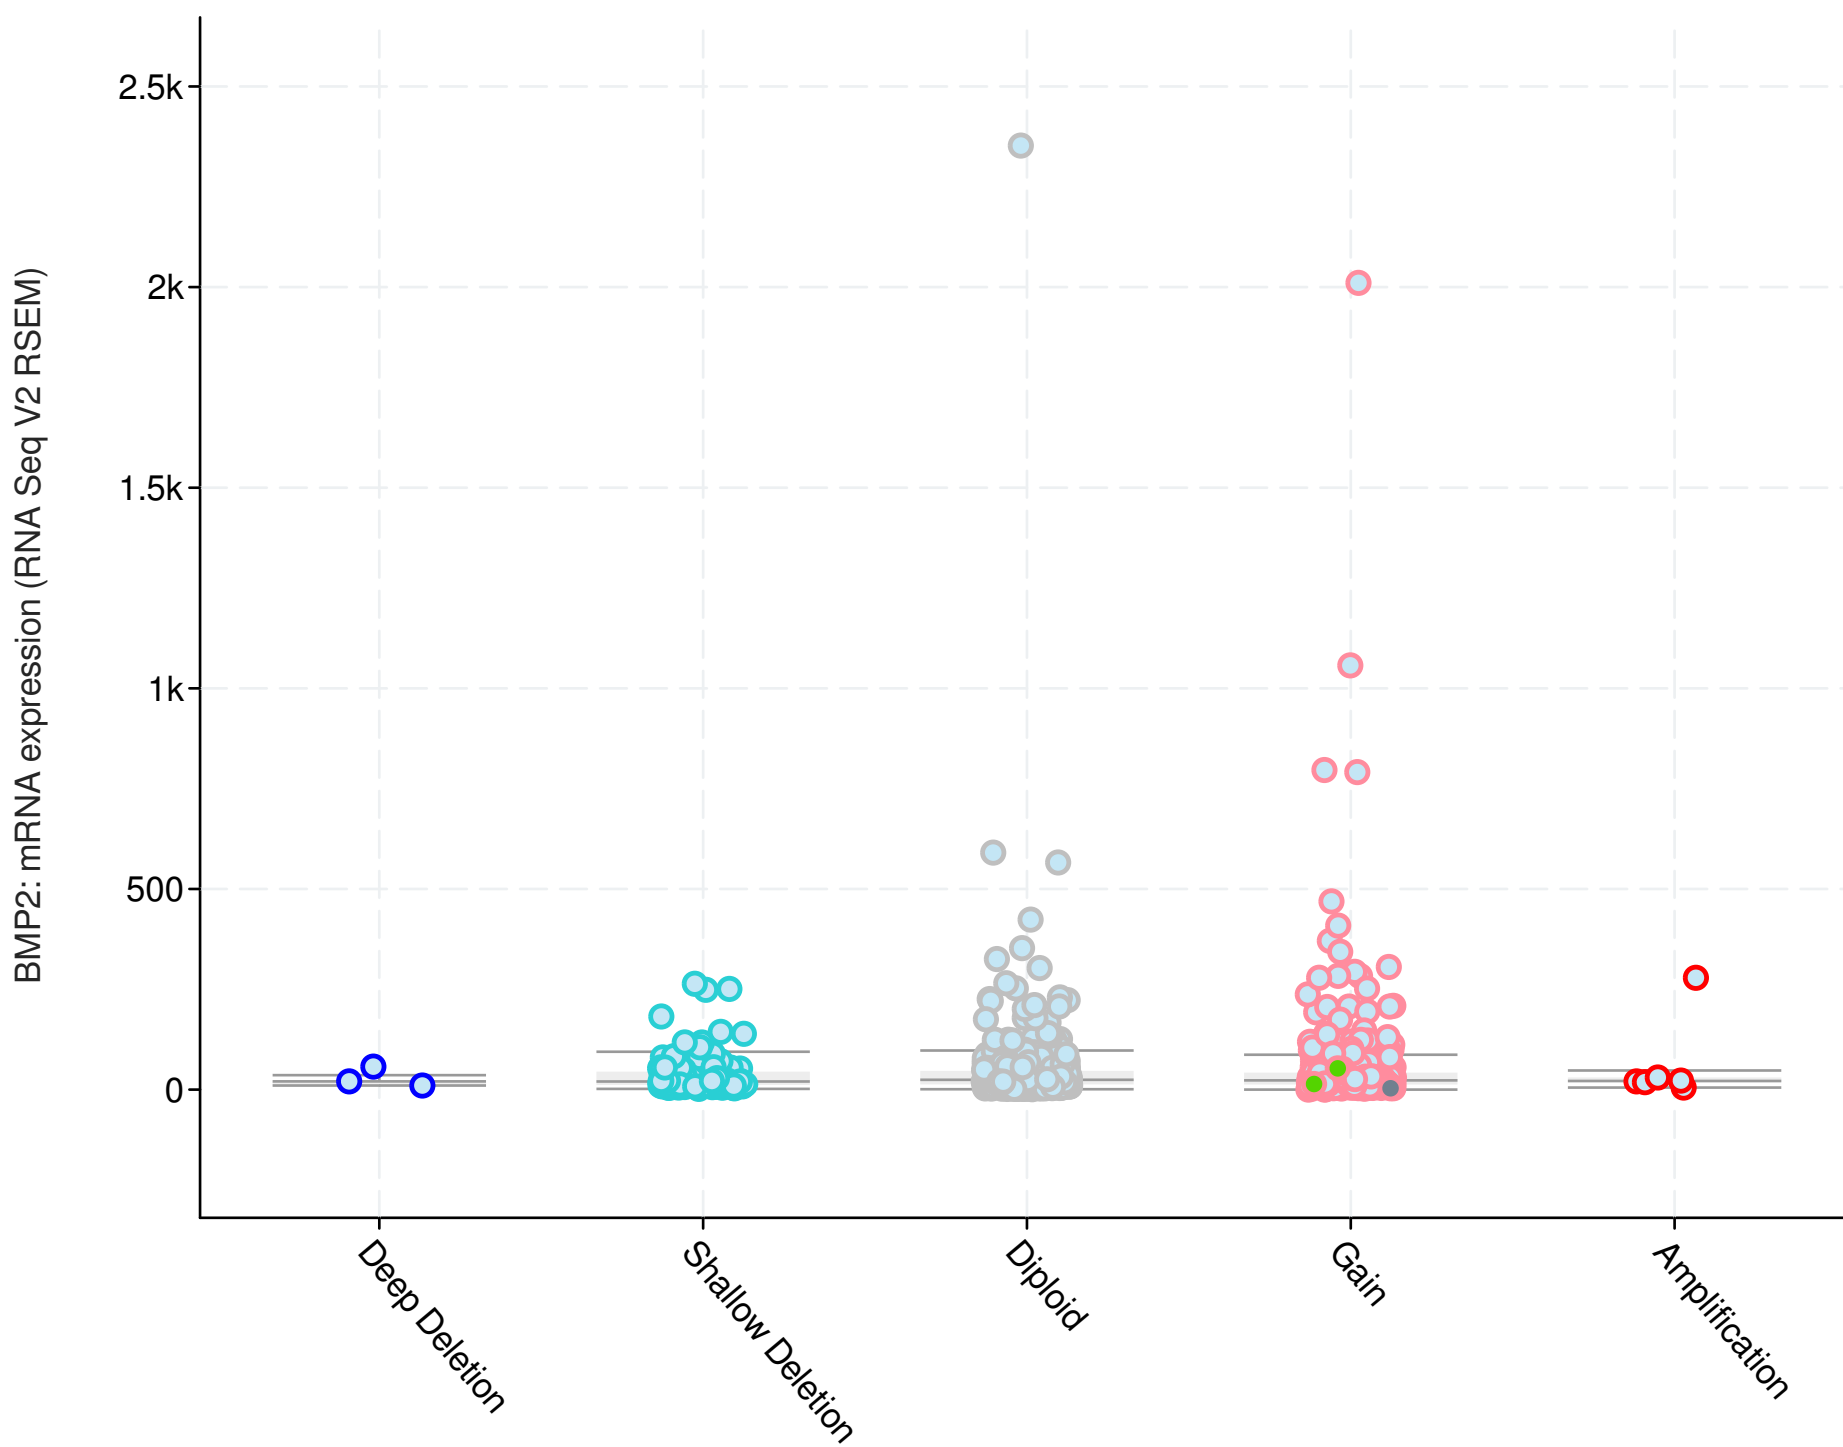

BMP2: Putative copy-number alterations from GISTIC

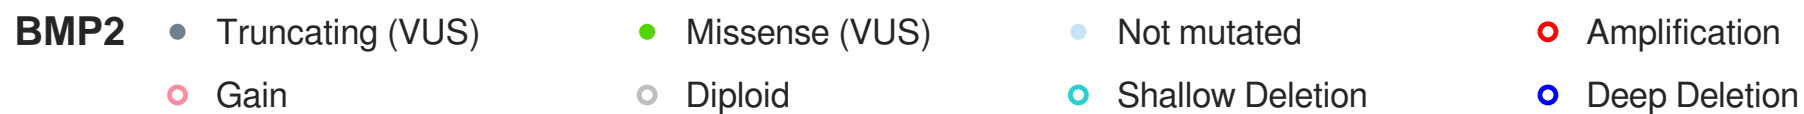

Supplement: minimal_dataset.zip [file minimal_dataset.zip]

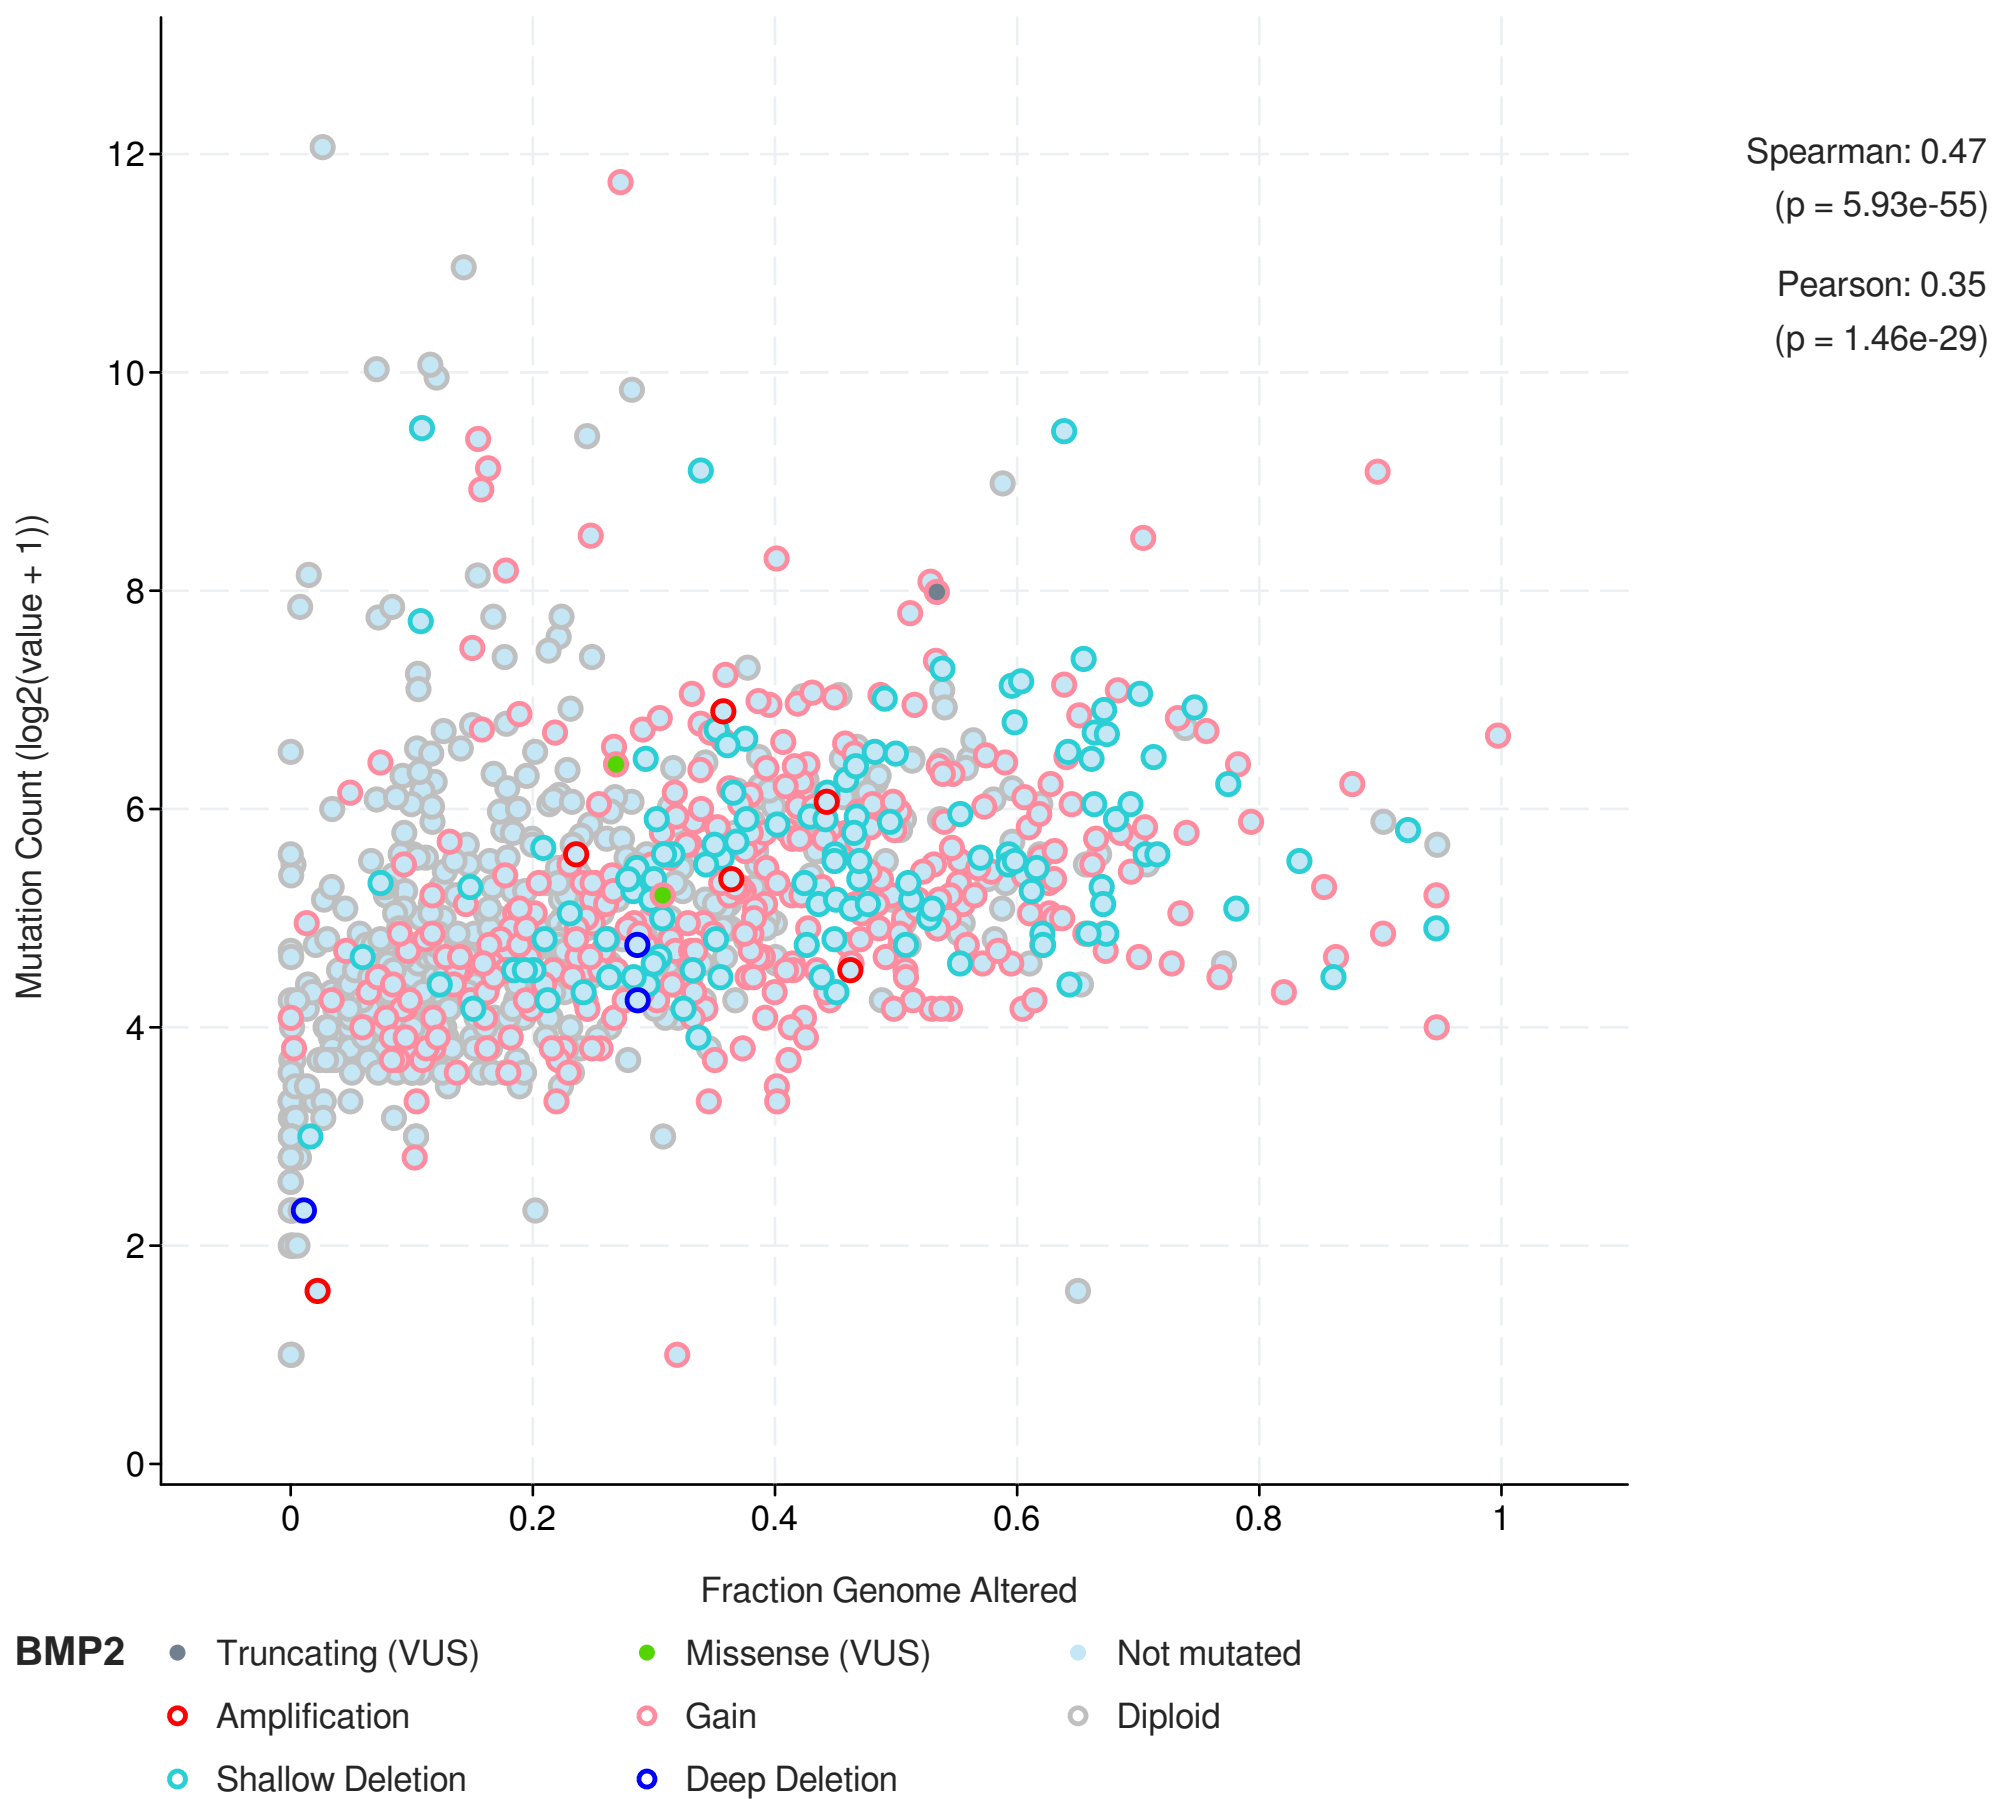

Supplement: minimal_dataset.zip [file minimal_dataset.zip]

Pam50 + Claudin-low subtype  
# samples (%)

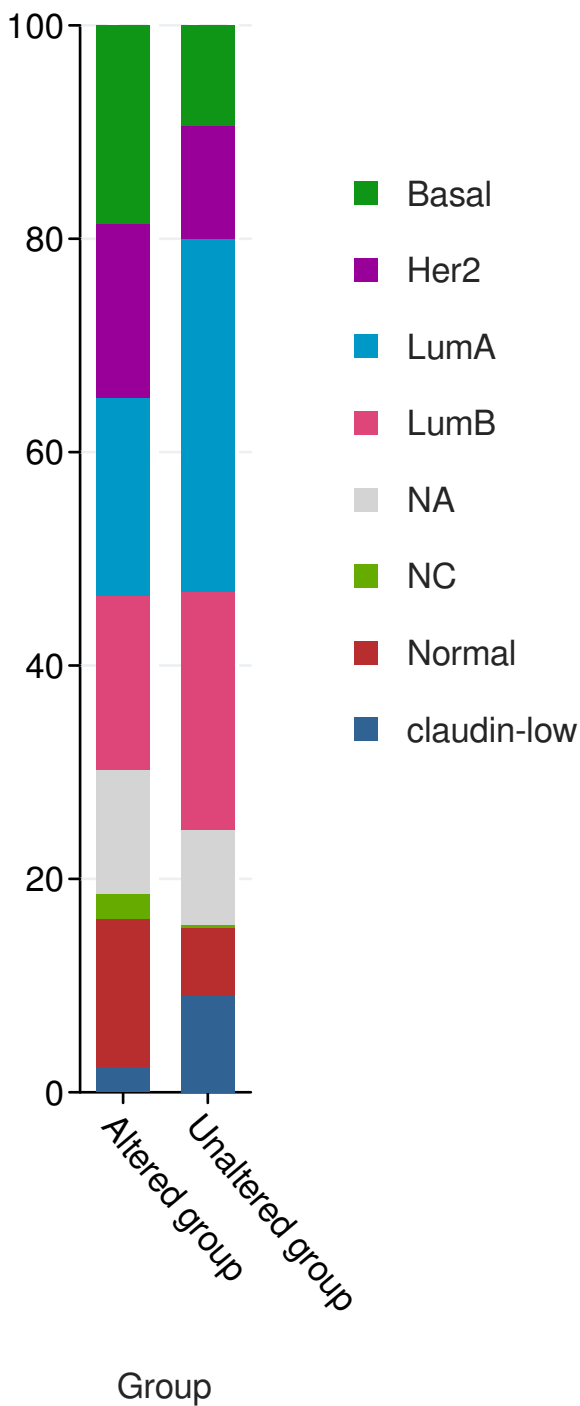

Supplement: minimal_dataset.zip [file minimal_dataset.zip]

Altered in 3 (100%) of 3 samples.

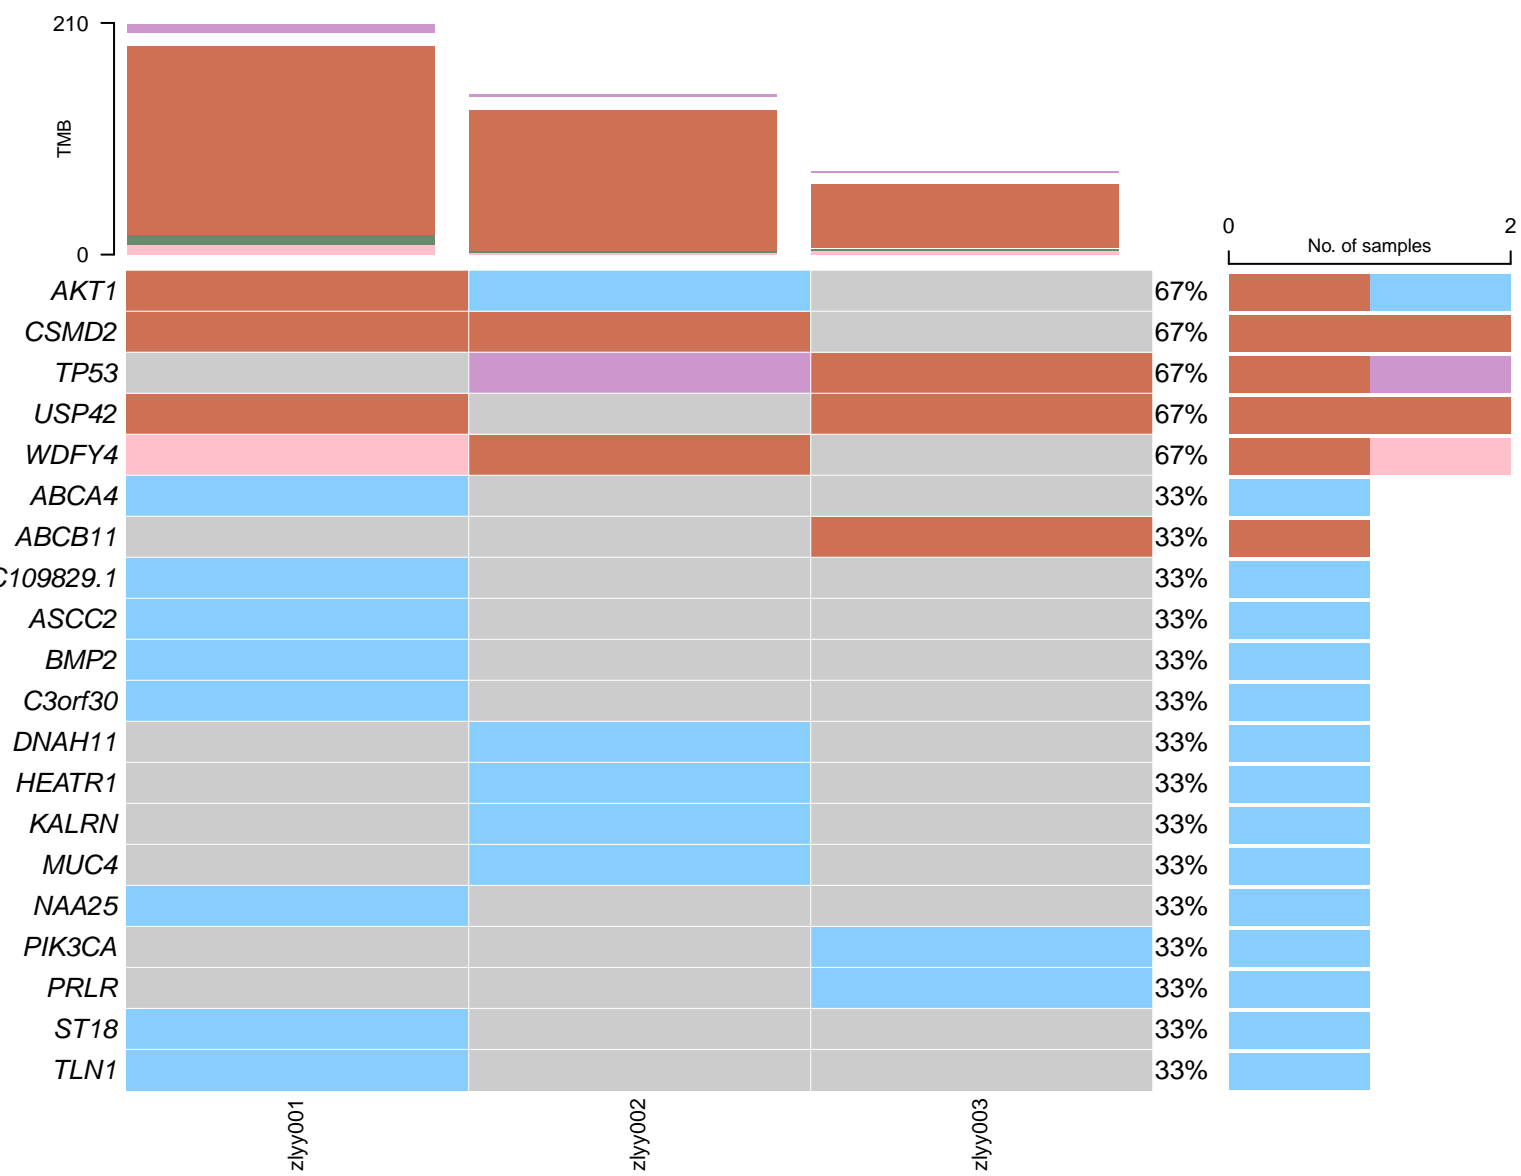

- Missense\_Mutation
- In\_Frame\_Del
- Splice\_Site
- Multi\_Hit
- Frame\_Shift\_Del

Supplement: minimal_dataset.zip [file minimal_dataset.zip]

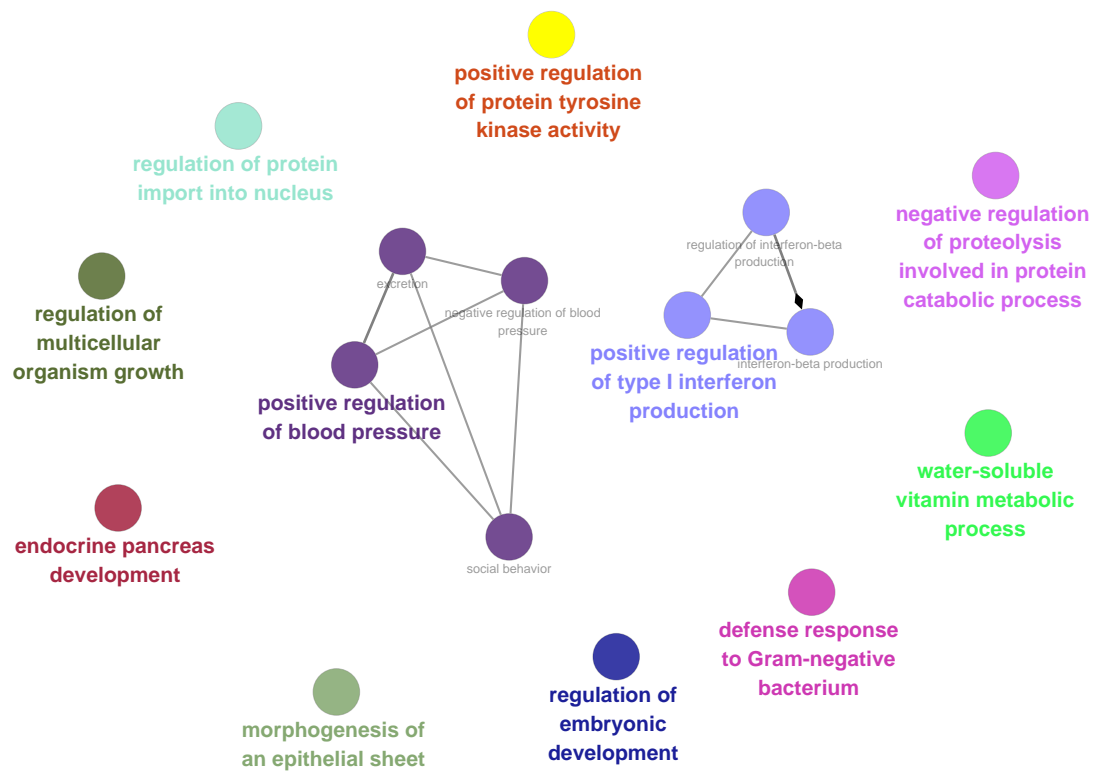

Supplement: minimal_dataset.zip [file minimal_dataset.zip]

*zlyy003*

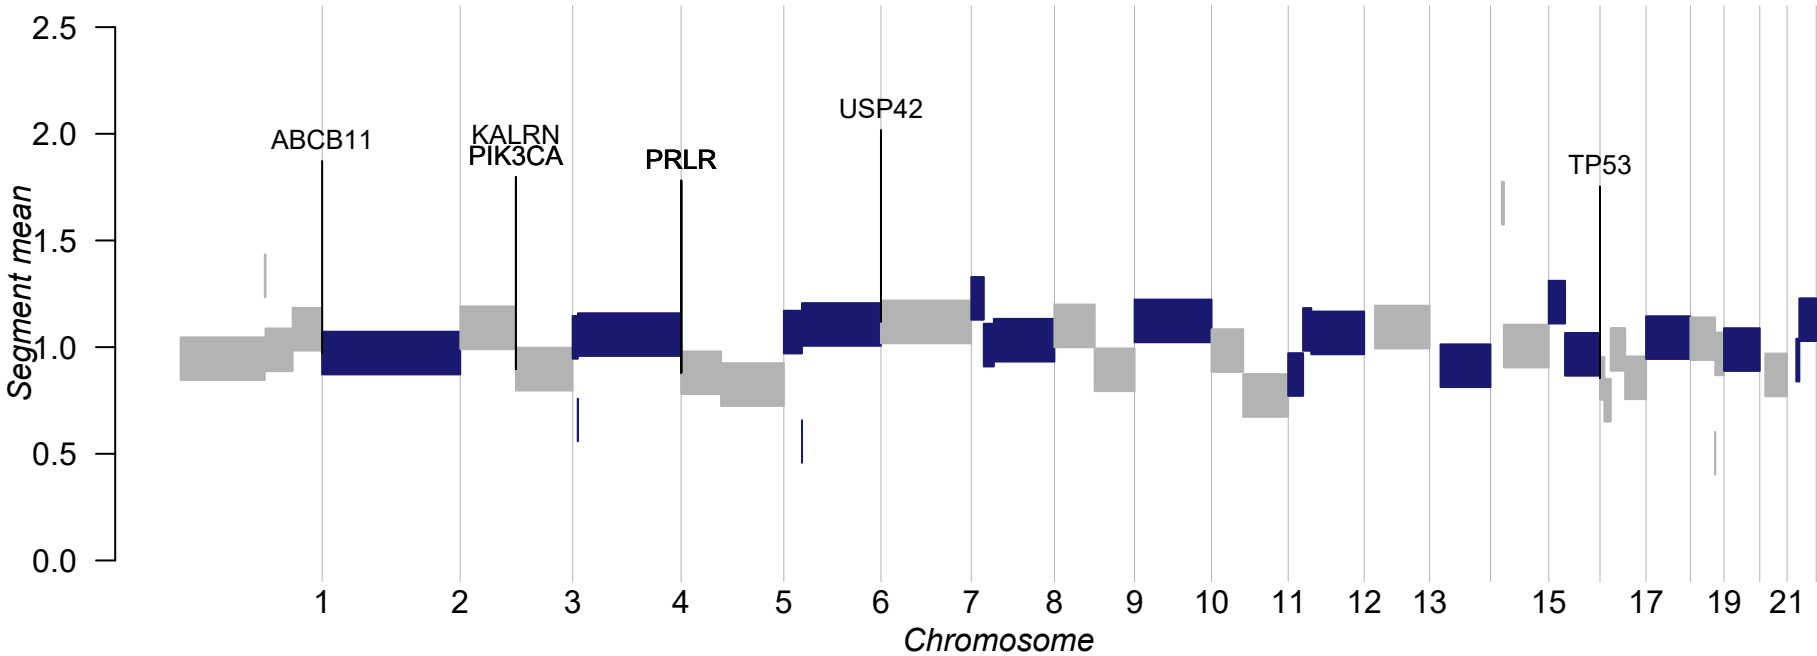

Supplement: minimal_dataset.zip [file minimal_dataset.zip]

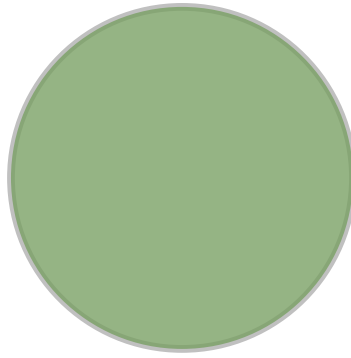

# GnRH secretion

Supplement: minimal_dataset.zip [file minimal_dataset.zip]

*zlyy002*

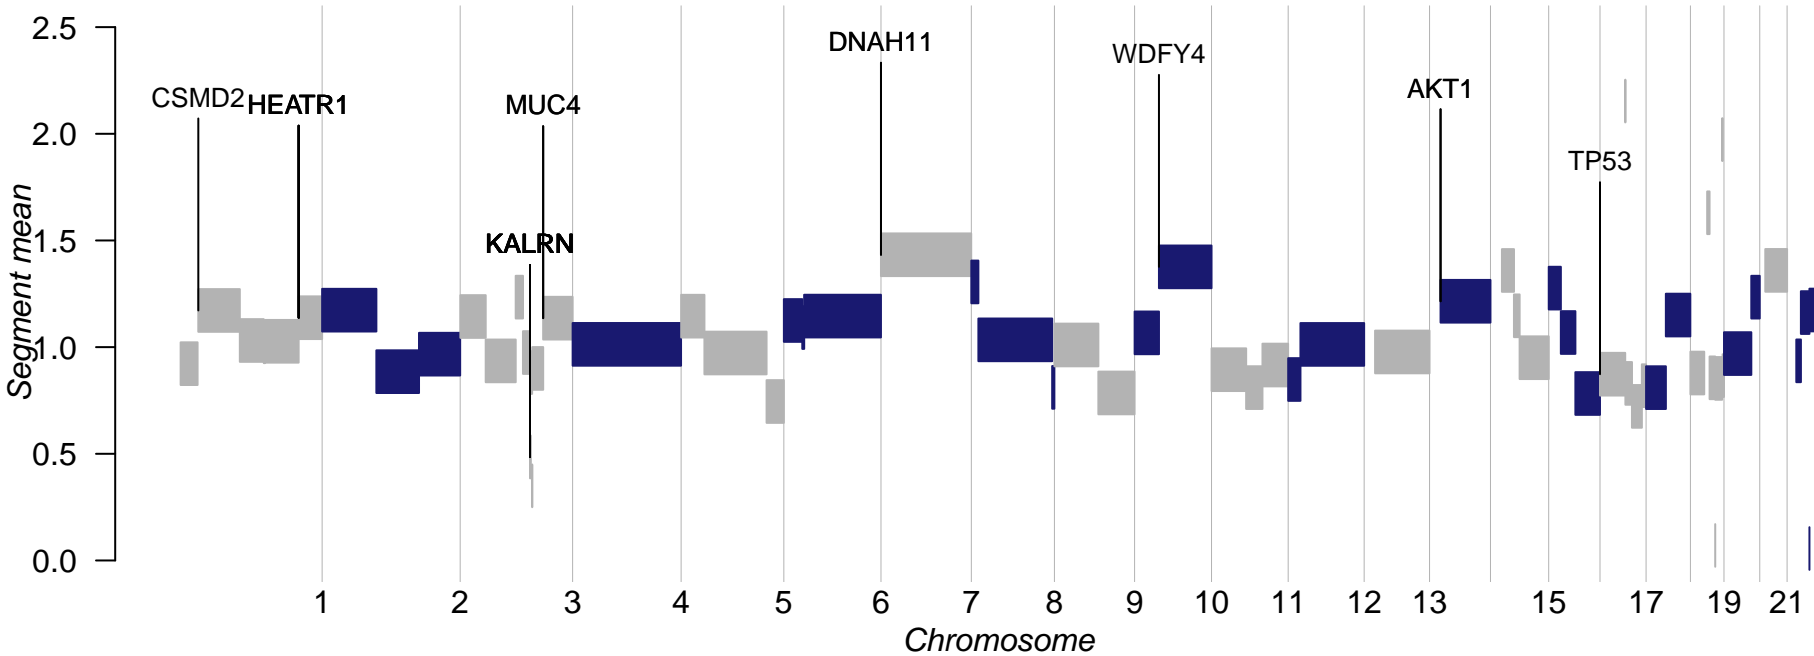

Supplement: minimal_dataset.zip [file minimal_dataset.zip]

# American Joint Committee on Cancer Metastasis Stage Code

# samples (%)

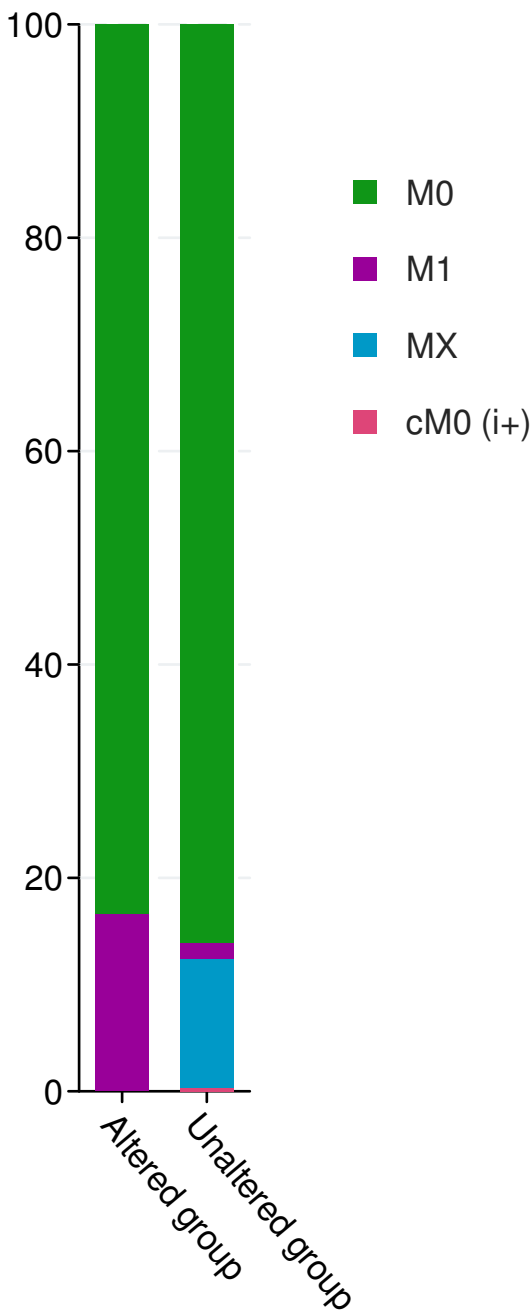

Group

Supplement: minimal_dataset.zip [file minimal_dataset.zip]
